1 **The GET pathway serves to activate Atg32-mediated mitophagy by ER targeting of the**  
2 **Ppg1-Far complex**

3

4 Mashun Onishi<sup>1</sup> and Koji Okamoto<sup>1\*</sup>

5

6 <sup>1</sup>Laboratory of Mitochondrial Dynamics, Graduate School of Frontier Biosciences,

7 Osaka University, Suita, Osaka 565-0871, Japan

8

9 \*Corresponding author.

10 E-mail address: kokamoto@fbs.osaka-u.ac.jp

11

12 **Keywords:** GET pathway; Atg32; Ppg1; Msp1; mitochondria; mitophagy

13 **Condensed title:** The GET pathway acts in promoting mitophagy

14

15

16

17

18

19

20

21

22

23

24

25 **Abstract**

26 Mitophagy removes defective or superfluous mitochondria via selective autophagy. In yeast, the  
27 pro-mitophagic protein Atg32 localizes to the mitochondrial surface and interacts with the  
28 scaffold protein Atg11 to promote degradation of mitochondria. Although Atg32-Atg11  
29 interactions are thought to be stabilized by Atg32 phosphorylation, how this posttranslational  
30 modification is regulated remains obscure. Here we show that cells lacking the guided entry of  
31 tail-anchored proteins (GET) pathway exhibit reduced Atg32 phosphorylation and Atg32-Atg11  
32 interactions, which can be rescued by additional loss of the ER-resident Ppg1-Far complex, a  
33 multi-subunit phosphatase negatively acting in mitophagy. In GET-deficient cells, Ppg1-Far is  
34 predominantly localized to mitochondria. An artificial ER anchoring of Ppg1-Far in GET-  
35 deficient cells significantly ameliorates defects in Atg32-Atg11 interactions and mitophagy.  
36 Moreover, disruption of GET and Msp1, an AAA-ATPase that extracts non-mitochondrial  
37 proteins localized to the mitochondrial surface, elicits synthetic defects in mitophagy. Collectively,  
38 we propose that the GET pathway mediates ER targeting of Ppg1-Far, thereby preventing  
39 dysregulated suppression of mitophagy activation.

40

41 **Introduction**

42 Mitochondria-specific autophagy, named mitophagy, is one of the membrane trafficking pathways  
43 conserved from yeast to humans. In this process, mitochondria are sequestered by flattened  
44 double-membrane structures called isolation membranes and transported to the lysosome (in  
45 mammals) or the vacuole (in yeast), a lytic compartment, for degradation ([Onishi and Okamoto,](#)  
46 [2021](#); [Onishi et al., 2021](#); [Palikaras et al., 2018](#)). In the budding yeast *Saccharomyces cerevisiae*,  
47 the outer mitochondrial membrane (OMM)-anchored protein Atg32 is phosphorylated in a  
48 manner dependent on casein kinase 2 (CK2) under mitophagy-inducing conditions ([Aoki et al.,](#)

49 [2011](#); [Kanki et al., 2013](#); [Kanki et al., 2009](#); [Kondo-Okamoto et al., 2012](#); [Okamoto et al., 2009](#)).

50 This posttranslational modification increases the affinity of Atg32 for Atg11, a scaffold protein

51 for assembly of core autophagy-related (Atg) proteins required for formation of autophagosomes

52 encapsulating mitochondria ([He et al., 2006](#); [Mao et al., 2013](#)). Conversely, Atg32

53 dephosphorylation is mediated by Ppg1, a PP2A-like phosphatase ([Furukawa et al., 2018](#)). Ppg1

54 interacts with the Far complex that acts in a cooperative manner to suppress Atg32

55 phosphorylation, Atg32-Atg11 interactions, and mitophagy ([Furukawa et al., 2018](#)). Together, the

56 phosphorylation-dephosphorylation switch for Atg32 is likely to be a key regulatory step to

57 initiate selective degradation of mitochondria.

58 Appropriate targeting of membrane proteins to correct subcellular destinations is critical to

59 maintain functional compartments within cells ([Barlowe and Miller, 2013](#)). Tail-anchored (TA)

60 proteins, which harbor a single transmembrane (TM) domain at the very C-terminus, are post-

61 translationally inserted into the membranes of mitochondria, peroxisomes, and ER, acting in a

62 myriad of cellular processes such as vesicular trafficking, protein import, and organelle dynamics

63 ([Barlowe and Miller, 2013](#)). In budding yeast, multiple TA proteins are targeted to the ER via the

64 guided entry of TA proteins (GET) pathway ([Denic, 2012](#); [Denic et al., 2013](#); [Farkas and](#)

65 [Bohnsack, 2021](#)). Prior to insertion into the ER membrane, the TM domains of TA proteins are

66 shielded by the cytosolic ATPase Get3 ([Bozkurt et al., 2009](#); [Mateja et al., 2015](#); [Mateja et al.,](#)

67 [2009](#); [Suloway et al., 2009](#); [Yamagata et al., 2010](#)). Then, the Get3-TA protein complexes are

68 recruited to the ER membrane-embedded Get1/2 insertase complex ([McDowell et al., 2020](#);

69 [Schuldiner et al., 2008](#); [Stefer et al., 2011](#); [Wang et al., 2014](#); [Wang et al., 2011](#)). Successful

70 interactions between Get1/2 and Get3 drive detachment of TA proteins from Get3, enabling their

71 insertion into the ER membrane by the Get1/2 complex. Upon disruption of the GET pathway,

72 several TA proteins are not properly localized to the ER, but instead, targeted to mitochondria

73 (Jonikas et al., 2009; Schuldiner et al., 2008). These ER-resident TA proteins on the OMM are  
74 removed by Msp1, a mitochondrial surface-anchored AAA-ATPase that extracts inappropriately  
75 targeted non-mitochondrial TA proteins and thus maintains mitochondrial membrane integrity  
76 (Chen et al., 2014; Okreglak and Walter, 2014; Wang et al., 2020; Wohlever et al., 2017; Zhang  
77 et al., 2011).

78 Our previous findings reveal a previously unappreciated role for Get1/2 in promoting  
79 mitophagy during prolonged respiratory growth (Onishi et al., 2018). In contrast to severely  
80 impaired mitophagy, other selective and bulk autophagy pathways are only slightly affected,  
81 indicating that the common core autophagy machinery itself is rarely altered in the absence of  
82 Get1/2 (Onishi et al., 2018). Although it is likely that the Get1/2 complex serves a specialized  
83 function in mitophagy, how this ER-resident TA protein insertase acts in degradation of  
84 mitochondria remains uncertain. In this study, we demonstrate that Atg32 phosphorylation and  
85 Atg32-Atg11 interactions are compromised in cells lacking Get components. Notably,  
86 perturbation of Ppg1-mediated Atg32 dephosphorylation mostly recovers Atg32-Atg11  
87 interactions and mitophagy in *get1/2*-null cells. Moreover, the Ppg1-Far complex is localized to  
88 the ER in a manner dependent on the GET pathway, and loss of the Get components leads to  
89 targeting of this phosphatase complex to mitochondria. Artificial ER localization of the Far  
90 complex in the absence of Get1/2 significantly restores Atg32-Atg11 interactions and mitophagy.  
91 In addition, disruption of Msp1 extractase activity in GET-deficient cells causes an exacerbation  
92 in mitophagy defects. Taken together, our data suggest that the GET pathway serves to promote  
93 appropriate targeting of the Ppg1-Far complex to the ER, thereby contributing to Atg32 activation  
94 at the initial stage of mitophagy.

95

## 96 **Results**

97 ***Atg32 phosphorylation and Atg32-Atg11 interactions are reduced in cells lacking Get***  
98 ***components***

99 In yeast, mitophagy initiation consists of three main steps, expression, mitochondrial localization,  
100 and phosphorylation of Atg32. Based on our previous results that Get components are not critical  
101 for Atg32 expression and mitochondrial localization (Onishi et al., 2018), we sought to test if loss  
102 of Get components affects Atg32 phosphorylation in the early phase of mitophagy. Atg32 is  
103 phosphorylated when wild-type cells are grown in respiratory media containing non-fermentable  
104 carbon sources such as glycerol (Gly) (Kondo-Okamoto et al., 2012). Under these mitophagy-  
105 inducing conditions, putative phosphorylated Atg32 molecules appeared as multiple upper bands  
106 (Fig. 1 A) that were diminished by treatment with a protein phosphatase (Fig. 1 B). In contrast,  
107 these mobility shifts seemed to be reduced in *get1/get2/get3*-null cells, indicating that Get  
108 components are important for efficient phosphorylation of Atg32 (Fig. 1 A).

109 As Atg32 phosphorylation is thought to be a key regulatory step for stabilizing Atg32-Atg11  
110 interactions (Aoki et al., 2011; Kondo-Okamoto et al., 2012), we next investigated whether loss  
111 of Get components impinges this protein-protein interaction for mitophagy. To address this issue,  
112 we applied the NanoBiT (NanoLuc Binary Technology, Promega) system, a luminescence-based  
113 assay for protein-protein interactions, to quantitative monitoring of Atg32-Atg11 interactions in  
114 live cells. When yeast cells expressing chromosomally integrated LgBiT-tagged Atg32 and  
115 SmBiT-tagged Atg11 were grown under respiratory conditions, the Atg32-Atg11 interaction  
116 brings the LgBiT and SmBiT subunits into close proximity, resulting in reversible reconstitution  
117 of an active luciferase that generates a luminescent signal in the presence of its substrate  
118 furimazine (Dixon et al., 2016) (Fig. S1 A). This system, which efficiently drives mitophagy (80%  
119 compared to wild-type cells) without overexpression, enables us to measure the resulting  
120 luminescent signals by a microplate reader and relatively quantify Atg32-Atg11 interactions *in*

121 *in vivo*. Our NanoBiT system detected lower luminescent signals in cells lacking Get1, Get2, or Get3  
122 (3-5-fold reduction compared to wild-type cells) under respiratory conditions (Fig. 1 C),  
123 indicating that Get components are required for promoting Atg32-Atg11 interactions.

124

125 ***Perturbation of the Ppg1 phosphatase restores Atg32-Atg11 interactions and mitophagy in***  
126 ***get1/2-null cells***

127 It is conceivable that a decrease in Atg32 phosphorylation causes suppression of Atg32-Atg11  
128 interactions in cells lacking Get components (Fig. 1, A and C). Thus, we hypothesized that  
129 augmentation of Atg32 phosphorylation could rescue the impaired protein-protein interactions for  
130 mitophagy in GET-deficient cells. To test this possibility, we attempted to genetically increment  
131 Atg32 phosphorylation by loss of Ppg1, a protein phosphatase acting in dephosphorylation of  
132 Atg32 and suppression of Atg32-Atg11 interactions (Furukawa et al., 2018). Accordingly, we  
133 performed the NanoBiT assay and found that consistent with the previous report (Furukawa et al.,  
134 2018), loss of Ppg1 increased Atg32-Atg11 interactions (2-3-fold compared to wild-type cells)  
135 (Fig. 2 A). Remarkably, in *get1/2 ppg1*-double-null cells, Atg32 interacted with Atg11 at near  
136 wild-type levels, supporting the idea that reduced Atg32 phosphorylation in cells lacking Get1/2  
137 is the primary cause of a defect in Atg32-Atg11 interactions (Fig. 2 A).

138 Next, we performed mitophagy assay using a mitochondrial matrix-localized DHFR-mCherry  
139 (mito-DHFR-mCherry) probe (Calvelli et al., 2020). When mitochondria are transported to the  
140 vacuole, DHFR-mCherry is processed by vacuolar proteases to generate free mCherry, enabling  
141 semi-quantitative detection of mitochondrial degradation. We confirmed that loss of Ppg1  
142 accelerated mitophagy (137% compared to wild-type cells) (Fig. 2, B and C). Strikingly,  
143 *get1/ppg1*- and *get2/ppg1*-double-null cells exhibited mitophagy at near wild-type levels (112%  
144 and 89%, respectively, compared to wild-type cells) (Fig. 2, B and C). Moreover, expression of a

145 *PPG1 HIIIN* gene encoding a catalytically inactive phosphatase restored Atg32-Atg11  
146 interactions and mitophagy in *get1/2*-null cells (Fig. S1, B-D). Together, these results suggest that  
147 perturbation of Ppg1 increased the affinity of Atg32 for Atg11 in *get1/2*-null cells, thereby  
148 recovering mitophagy.

149 To exclude the possibility that restoration of mitophagy in *get1/ppg1*- and *get2/ppg1*-double-  
150 null cells is caused indirectly by pleiotropic alterations in Ppg1 substrate(s), we examined Atg32  
151 variants lacking the amino acid residues 151-200 that are required for the Ppg1-Far complex to  
152 interact with Atg32 (Furukawa et al., 2018; Innokentev et al., 2020). When this truncation was  
153 introduced into the NanoBiT system, the Atg32 mutant ( $\Delta 151-200$ ) interacted with Atg11 14-18-  
154 fold more strongly than the full-length protein in the presence of Get1, and at near wild-type levels  
155 even in the absence of Get1 (Fig. 2 D). Consistent with these results, mitophagy in *get1/2*-null  
156 cells were mostly restored by expression of the Atg32 mutant ( $\Delta 151-200$ ) (Fig. 2, E and F),  
157 supporting the idea that Ppg1-Far-mediated suppression of Atg32-Atg11 interactions and  
158 mitophagy is exacerbated in the absence of Get1/2.

159

### 160 ***The ER-resident Far complex predominantly targets to mitochondria in GET-deficient cells***

161 How could Ppg1 abrogate mitophagy in cells lacking Get1/2? It has been demonstrated that ER-  
162 resident TA proteins localize to mitochondria in *get1/2*-null cells (Jonikas et al., 2009; Schuldiner  
163 et al., 2008). In addition, Ppg1 interacts with the Far complex that acts in pheromone-induced cell  
164 cycle arrest and the TORC2 signaling pathway (Furukawa et al., 2018; Kemp and Sprague, 2003;  
165 Pracheil et al., 2012). Moreover, the Far complex contains the TA proteins Far9 and Far10, and is  
166 anchored to the ER membrane in a manner dependent on their TA domains (Pracheil and Liu,  
167 2013). Based on these findings, we hypothesized that disruption of the GET pathway may lead to  
168 targeting of the ER-resident Ppg1-Far complex to the surface of mitochondria, thereby

169 oversuppressing mitophagy. To test this idea, Far8, a component of the Far complex, was  
170 functionally tagged with three copies of GFP, expressed from the chromosomal *FAR8* locus  
171 without overexpression, and observed using fluorescence microscopy. We found that Far8-3×GFP  
172 mostly colocalized with mCherry-tagged Sec63, an ER-anchored Hsp40/DnaJ family protein  
173 (Feldheim et al., 1992) that exhibited peripheral and perinuclear patterns, in wild-type cells under  
174 respiratory conditions (Fig. 3, A and B). By contrast, Far8-3×GFP predominantly localized to  
175 mitochondria in *get1*-null cells (93% of cells lacking Get1 and 9% of wild-type cells) (Fig. 3, C  
176 and D). We also confirmed that loss of Get2 or Get3 greatly increased mitochondria-targeted Far8-  
177 3×GFP (96% and 92% of *get2*- and *get3*-null cells, respectively) (Fig. S2 A).

178 To clarify whether the insertase activity of Get1/2 is required for Far8-3×GFP localization to  
179 the ER, we generated yeast strains expressing an inactive Get1 or Get2 variant with point  
180 mutations in their conserved cytosolic domain (Get1NRm: N72A, R73A, Get2RERRm: R14E,  
181 E15R, R16E, R17E) (Wang et al., 2011), and found that expression of these insertase-inactive  
182 mutants significantly disturbed ER localization of Far8-3×GFP (95% and 98% of cells expressing  
183 Get1NRm and Get2RERRm, respectively) (Fig. S2 B), further underscoring a primary role for  
184 the GET pathway in ER targeting of the Ppg1-Far complex. In cells expressing these mutants,  
185 mitophagy was moderately reduced (Fig. S2, C and D), indicating that the Get1/2 insertase  
186 activity is required for efficient mitophagy.

187 Since targeting of ER-resident TA proteins to the mitochondrial surface requires their TA  
188 domains (Farkas and Bohnsack, 2021), we assumed that loss of Far9 or Far10 could diminish  
189 mitochondrial localization of the Far complex in cells lacking Get1/2. In line with this idea, we  
190 found that Far8-3×GFP was hardly localized to mitochondria, but instead mostly dispersed  
191 throughout the cytoplasm (probably excluded from the vacuolar lumen) in *far9/10*-null, *far9/get1*-  
192 and *far10/get1*-double-null cells (Fig. 3, E and F), indicating that these TA proteins are



193 indispensable for targeting of the Far complex to the ER in wild-type cells or mitochondria in  
194 GET-deficient cells.

195 It has recently been reported that a fraction of the Far complex is localized to mitochondria  
196 even in wild-type cells under fermentable conditions (Innokentev et al., 2020). Although we  
197 barely found mitochondrial localization of Far8-3×GFP under non-fermentable conditions (Fig.  
198 3, A and C), it remained possible that a small fraction of the Far complex is localized to  
199 mitochondria and degraded in a mitophagy-dependent manner. To clarify this issue, we performed  
200 GFP-processing assays. Similar to mito-DHFR-mCherry, Far8-3×GFP localized to the ER and  
201 mitochondria can be transported to the vacuole and processed to generate free GFP via ER-phagy  
202 and mitophagy, respectively. Under respiratory conditions, generation of free GFP was reduced  
203 by 50% in cells without mitophagy (*atg32*-null) or ER-phagy (*atg39/40*-double-null) (Mochida  
204 et al., 2015) and 25% in cells without both events (*atg32/39/40*-triple-null) compared to wild-type  
205 cells (Fig. S2, E and F). These results support the notion that a small fraction of the Ppg1-Far  
206 complex escapes the GET pathway and localizes to the surface of mitochondria.

207

### 208 ***Loss of the Far9/10 TA proteins rescues mitophagic deficiencies in cells lacking Get1/2***

209 Our observations that mitochondrial localization of the Far complex in *get1*-null cells was  
210 diminished by loss of Far9 or Far10 (Fig. 3, E and F) led us to examine Atg32-Atg11 interactions  
211 and mitophagy in the absence of these TA proteins. Similar to the results obtained from *ppg1*-null  
212 cells (Fig. 2, A-C), Atg32 interacted with Atg11 2-3-fold more strongly in cells lacking Far9 than  
213 wild-type cells (Fig. 4 A). In addition, consistent with the previous findings (Furukawa et al.,  
214 2018), mitophagy under respiratory conditions was increased in *far9*-null cells (139% compared  
215 to wild-type cells) (Fig. 4, B and C). Strikingly, Atg32-Atg11 interactions and mitophagy were  
216 restored at near wild-type levels in *get1/far9*- and *get2/far9*-double-null cells (Fig. 4, A-C).

217 Next, we investigated cells lacking Far10 and found only a slight and no increase in Atg32-  
218 Atg11 interactions and mitophagy (1.2-fold and 98%, respectively, compared to wild-type cells)  
219 (Fig. S3, A-C). Notably, *get1/far10*- and *get2/far10*-double-null cells exhibited a partial recovery  
220 in Atg32-Atg11 interactions (0.7- and 0.4-fold, respectively, compared to wild-type cells) (Fig.  
221 S3 A) and a substantial restoration in mitophagy (96% and 69%, respectively, compared to wild-  
222 type cells) (Fig. S3, B and C). Collectively, these data suggest that the Ppg1-Far complex is  
223 anchored to the mitochondrial surface via Far9/10 and acts in suppression of Atg32-Atg11  
224 interactions and mitophagy.

225

226 ***Artificial ER anchoring of the Far complex increases Atg32-Atg11 interactions and mitophagy***  
227 ***in get1/2-null cells***

228 Based on our findings that loss of Get1/2 leads to excess mitochondrial localization of the Ppg1-  
229 Far complex (Fig. 3, A-D; and Fig. S2 A), we asked whether Get1/2-independent ER localization  
230 of the Ppg1-Far complex ameliorates mitophagy deficiencies in cells lacking Get1/2. To this end,  
231 the TA domain of Far9 was replaced with the TM domain (TM<sup>ER</sup>) of Sec12, a single-pass ER  
232 membrane protein consisting of an N- and C-terminal domains facing the cytosol and ER lumen,  
233 respectively (d'Enfert et al., 1991). We confirmed that expression of Far9-TM<sup>ER</sup> does not cause  
234 significant alterations in ER shape and Far8-3×GFP localizations (Fig. 5, A and B). As expected,  
235 Far8-3×GFP in cells expressing Far9-TM<sup>ER</sup> was localized to the ER even in *get1/2*-null cells (Fig.  
236 5, A and B; and Fig. S4, A and B). In addition, expression of Far9-TM<sup>ER</sup> in cells lacking Get1/2  
237 restored Atg32-Atg11 interactions at near wild-type levels (Fig. 5 C). Moreover, mitophagy was  
238 increased in *get1*- and *get2*-null cells (70% and 80%, respectively compared to wild-type cells)  
239 (Fig. 5, D and E), suggesting that ER retention of the Ppg1-Far complex is critical for efficient  
240 mitophagy.

241

242 ***Artificial mitochondrial anchoring of the Far complex partially reduces mitophagy***

243 As excess accumulation of the Far complex on the mitochondrial surface by loss of Get1/2 seems  
244 to perturb mitophagy, we sought to test if artificial targeting of the Far complex to mitochondria  
245 may suppress mitophagy without disrupting Get1/2 functions. The TA domains of Far9 and Far10  
246 were replaced with those derived from Gem1 (Frederick et al., 2004), an OMM protein  
247 (Far9/Far10-TA<sup>MITO</sup>). We confirmed that Far8-3×GFP almost exclusively localizes to  
248 mitochondria in cells expressing Far9/Far10-TA<sup>MITO</sup> (Fig. 6, A and B). In these cells, mitophagy  
249 under respiratory conditions was partially reduced (70% compared to wild-type cells) (Fig. 6, C  
250 and D). Importantly, this reduction was mostly abrogated in cells expressing Ppg1<sup>H111N</sup>, a  
251 catalytically inactive mutant (Fig. S5, A and B), suggesting that mitophagy suppression by the  
252 OMM-anchored Far complex requires Ppg1 phosphatase activity.

253

254 ***Msp1 is required for efficient mitophagy in cells lacking Get3***

255 Previous studies demonstrate that Msp1, an OMM-anchored AAA-ATPase acting as an extractase,  
256 is important to remove non-mitochondrial TA proteins from the surface of mitochondria in the  
257 absence of Get components (Chen et al., 2014; Okreglak and Walter, 2014; Wang et al., 2020).  
258 Accordingly, we asked whether loss of Msp1 exacerbates mitophagy deficiencies in cells lacking  
259 the GET pathway. As double knockout of Msp1 and Get1/2 elicited extremely severe growth  
260 defects under respiratory conditions, we performed fluorescence microscopy and mitophagy  
261 assays for *msp1/get3*-double-null cells that could grow slowly with relatively mild phenotypes in  
262 liquid non-fermentable medium. Single knockout of Msp1 and Get3 slightly affected mitophagy  
263 (85% and 93%, respectively, compared to wild-type cells), whereas loss of these two proteins  
264 significantly compromised mitophagy (48% compared to wild-type cells) (Fig. 7, A and B). In

265 addition, loss of Get3 in cells expressing Msp1<sup>E193Q</sup> (Msp1EQ, an ATPase-inactive mutant) also  
266 synergistically disturbed degradation of mitochondria (51% compared to wild-type cells) (Fig. 7,  
267 A and B). These results suggest that Msp1 ATPase activity is critical to prevent mitophagy  
268 suppression in GET-deficient cells.

269 Next, we performed fluorescence microscopy and found that loss of Msp1 did not significantly  
270 affect ER localization of Far8-3×GFP (Fig. 7, C and D). By contrast, Far8-3×GFP localized to  
271 mitochondria in *get3*-null and *msp1/get3*-double-null cells (Fig. 7, C and D). Based on these  
272 observations, we investigated if loss of Ppg1 affects mitophagy in *msp1/get3*-double-null cells,  
273 and found that *msp1/get3/ppg1*-triple-null cells significantly restored mitophagy (81% compared  
274 to wild-type cells) (Fig. 7, E and F). Similarly, expression of Atg32(Δ151-200), a deletion mutant  
275 lacking a domain required for Ppg1-mediated dephosphorylation, also increased mitophagy in  
276 cells lacking Get3 and Msp1 (60% compared to wild-type cells) (Fig. S5, C and D). Collectively,  
277 these results support the idea that the GET pathway and Msp1 cooperatively act to prevent  
278 suppression of mitophagy by the Ppg1-Far complex.

279

## 280 Discussion

281 In the present study, we show that the GET pathway contributes to Atg32 phosphorylation by  
282 promoting localization of the Ppg1-Far phosphatase complex to the ER (Fig. 8). Loss of Get1/2  
283 (ER membrane-anchored insertase), or Get3 (cytosolic ATPase), partially reduces Atg32  
284 phosphorylation, thereby abrogating Atg32-Atg11 interactions in the early phase of respiratory  
285 growth (Fig. 1, A and C). Consistent with this observation, mitophagy is severely compromised  
286 in *get1/2*-null cells under prolonged respiration (Onishi et al., 2018). However, cells lacking Get3  
287 exhibit only minor defects in mitophagy (Onishi et al., 2018), raising the possibility that in the  
288 prolonged phase of respiratory growth, Get1/2 may have unappreciated additional function(s) to

289 promote mitophagy independently of its insertase activity (Fig. S2, B-D), or that unknown  
290 protein(s) may exert a Get3-related compensatory role in promoting mitophagy.

291 Evidently, Atg32-Atg11 interactions and mitophagy in cells lacking Get1/2 can mostly be  
292 restored by additional loss of Ppg1, a phosphatase that dephosphorylates Atg32 (Fig. 2, A-F),  
293 suggesting that Ppg1 is likely to be the primary cause of reduced Atg32 phosphorylation in *get1/2*-  
294 null mutants. Consistent with these findings, loss of Far9, a component of the Far complex that  
295 binds to Ppg1 and acts in a cooperative manner to dephosphorylate Atg32, also increased Atg32-  
296 Atg11 interactions and mitophagy in Get1/2-deficient cells (Fig. 4, A-C). Far9 is an ER-resident  
297 TA protein of the Far complex (Pracheil and Liu, 2013), and loss of the Get1/2 insertase activity  
298 perturbs ER localization of the Far complex (Fig. 3, A-D; and Fig. S2, A and B), supporting the  
299 idea that the GET pathway promotes insertion of the Far TA proteins to the ER membrane.

300 Although disruption of the GET pathway leads to targeting of multiple ER-resident TA proteins  
301 to mitochondria (Jonikas et al., 2009; Schuldiner et al., 2008), how these ectopically targeted  
302 proteins impact events on the mitochondrial surface remains enigmatic. Upon loss of Get  
303 components, the Far complex predominantly targets to mitochondria (Fig. 3, A-D; and Fig. S2, A  
304 and B) in a manner dependent on the TA proteins Far9 and Far10 (Fig. 3, E and F). Anchoring to  
305 the mitochondrial surface seems to be critical for the Far complex to efficiently abrogate Atg32-  
306 Atg11 interactions and mitophagy, since cytosolic diffusion or GET-independent ER anchoring  
307 of the Far complex leads to restoration of those processes in *get1/2*-null cells (Fig. 4, A-C; and  
308 Fig. S3, A-C; and Fig. 5, C-E). Based on the observations from us (Fig. S2, E and F) and others  
309 (Innokentev et al., 2020) that a fraction of the Far complex localizes to mitochondria even in wild-  
310 type cells, we favor a hypothetical model that dynamic changes in the GET pathway (*e.g.*  
311 expression level, insertase activity, and substrate affinity) could affect the number of Ppg1-Far  
312 complex targeted to the ER or mitochondria, thereby serving as a regulatory process for

313 mitophagy (Fig. 8). Further studies are needed to test this hypothesis.

314 During the course of this study, we noticed that our several results seem to be somewhat  
315 different from the recently reported data on localization and function of the Ppg1-Far complex  
316 (Innokentev et al., 2020). First, we demonstrate that the Far complex is mostly localized to the  
317 ER in cells during non-fermentable growth (Fig. 3 A-D), whereas it has been shown that the Far  
318 complex is distributed almost equally to both mitochondria and the ER in cells during fermentable  
319 growth (Innokentev et al., 2020). These distinct features might be due to different growth  
320 condition (mitophagy-inducing or -noninducing). Second, cells containing the GET-  
321 independently ER-localized Far complex exhibit mitophagy at near wild-type levels under  
322 prolonged respiration (Fig. 5, D and E), whereas cells containing the Far9-Cyb5<sup>TA</sup>-dependently  
323 ER-localized Far complex have been shown to accelerate mitophagy at the early stationary phase  
324 (Innokentev et al., 2020). These differences might result from TM segments (one derived from  
325 the non-TA protein Sec12 or TA protein Cyb5) and/or mitophagy assay time points (72 h or 40 h  
326 in non-fermentable medium). Third, we show that Gem1 TA-dependent artificial targeting of the  
327 Far complex to mitochondria causes a partial defect in mitophagy under prolonged respiration  
328 (Fig. 6, C and D), whereas it has been demonstrated that mitochondria-targeted Far complex by  
329 Tom5 TA strongly diminishes mitophagy at the early stationary phase (Innokentev et al., 2020).  
330 This phenotypic difference might be attributed to TA domains used for mitochondrial anchoring  
331 and/or mitophagy assay time points (72 h or 40 h in non-fermentable medium). Nevertheless, it  
332 seems possible that the mitochondria-anchored Ppg1-Far complex could suppress stationary-  
333 phase mitophagy more effectively at the early phase than the late phase.

334 Expression of the Get1/2 insertase-inactive mutants leads to extensive accumulation of the  
335 Ppg1-Far complex on the mitochondrial surface, while mitophagy is only partially decreased in  
336 these mutant cells (70% compared to wild-type cells) (Fig. S2, B-D). Notably, these phenotypes

337 are similar to those in *get3*-null cells (Fig. 7, A-D) (Onishi et al., 2018), which is in agreement  
338 with the previous finding that the Get1/2 insertase-inactive mutants cannot recruit Get3 to the ER  
339 (Wang et al., 2011). In addition, artificial targeting of the Ppg1-Far complex to mitochondria only  
340 partially reduces mitophagy under prolonged respiration (70% compared to wild-type cells) (Fig.  
341 6, C and D). Together, these findings raise the possibility that Get1/2 may be a bifunctional  
342 complex acting as a general insertase for ER-resident TA proteins, and serving as a pro-  
343 mitophagic factor independently of its insertase activity.

344 Finally, our data reveal a potential role of the OMM-anchored AAA-ATPase Msp1 in  
345 mitophagy. Consistent with the previous reports that Msp1 extracts non-mitochondrial TA  
346 proteins from the mitochondrial surface upon loss of Get components (Chen et al., 2014; Okreglak  
347 and Walter, 2014; Wang et al., 2020; Wohlever et al., 2017), cells lacking both Get3 and Msp1  
348 display synthetic defects in mitophagy that can be rescued by loss of Ppg1 or expression of an  
349 Atg32 variant defective for interaction with the Ppg1-Far complex (Fig. 7, A and B, E and F; and  
350 Fig. S5, C and D). Thus, although ER localization of the Far complex seems to be hardly altered  
351 in cells lacking Msp1 (Fig. 7, C and D), it remains possible that this OMM-anchored extractase  
352 may act in removal of non-mitochondrial TA proteins, such as Far9 and Far10, thereby  
353 contributing to Atg32 phosphorylation, Atg32-Atg11 interactions, and mitophagy (Fig. 8). How  
354 the GET pathway and Msp1 coordinately act in activation of Atg32-mediated mitophagy awaits  
355 further investigations.

356

## 357 **Materials and methods**

### 358 **Yeast strains and plasmids used in this study**

359 Yeast strains and plasmids used in this thesis are listed in Table S1 and S2. Standard genetic and  
360 molecular biology methods were performed for generating yeast strains.

361

### 362 **Growth conditions of yeast**

363 Yeast cells were incubated in YPD medium (1% yeast extract, 2% peptone and 2% dextrose),  
364 synthetic medium (0.17% yeast nitrogen base without amino acids and ammonium sulfate, 0.5%  
365 ammonium sulfate) with 0.5% casamino acids and either 2% dextrose (SDCA), or 0.1% dextrose  
366 plus 3% glycerol (SDGCA), supplemented with the necessary amino acids. For mitophagy assay  
367 under respiratory conditions, cells grown to mid-log phase in SDCA were transferred to SDGCA  
368 and incubated at 30°C.

369

### 370 **Protein phosphatase treatment assays**

371 For protein phosphatase assays, cells were pre-grown in SDCA, and transferred to SDGCA. 2.0  
372 OD<sub>600</sub> units of cells were collected and subjected to alkaline lysis and TCA (Trichloroacetic acid)  
373 precipitation. The pellet was resuspended in a reaction buffer (50 mM Tris-HCl pH 7.5, 100 mM  
374 NaCl, 2 mM DTT, 0.5 mM EDTA, 0.01% Brij-35, 2 mM MgCl<sub>2</sub>), treated with or without lambda  
375 protein phosphatase ( $\lambda$ -PPase) in the presence or absence of PPase inhibitor at 30°C for 1 h.  
376 Samples corresponding to 0.2 OD<sub>600</sub> units of cells were loaded per lane

377

### 378 **Structured illumination microscopy**

379 Live yeast cells expressing Far8-3×GFP were observed using a structured illumination  
380 microscopy (Stefer et al.). Differential interference contrast (DIC) and fluorescence images were  
381 obtained under a KEYENCE BZ-X810 system equipped with a 100× objective lens (CFI  
382 Apochromat TIRF 100XC Oil, Plan-APO TIRF 100, NA: 1.49; Nikon), filter sets for GFP and  
383 mCherry (BZ-X filter GFP and BZ-X filter TRITC, respectively; KEYENCE). Cell images were  
384 captured using acquisition and analysis software (BZ-X800 Analyzer; KEYENCE).



385

386 **Western blotting**

387 Samples corresponding to 0.1-0.4 OD<sub>600</sub> units of cells were separated by SDS-PAGE followed  
388 by western blotting and immunodecoration with primary antibodies raised against mCherry  
389 (1:2,000, Abcam ab125096), Pgk1 (1:10,000, Abcam, ab113687), GFP (1:1000, Roche,  
390 13921700), HA (1:5,000, Sigma, A2095). After treatment with the secondary antibodies,  
391 horseradish peroxidase (HRP)-conjugated rabbit anti-mouse IgG (H + L) for mCherry, GFP, HA,  
392 Pgk1, followed by the enhanced chemiluminescence reagent Western Lightning Plus-ECL  
393 (PerkinElmer, 203-19151) or ImmunoStar LD (Wako, PTJ2005), proteins were detected using a  
394 luminescent image analyzer (FUSION Solo S; VILBER). Quantification of the signals was  
395 performed using FUSION Solo S (VILBER).

396

397 **Bioluminescence assay for protein-protein interactions**

398 For quantitative analysis of Atg32-Atg11 interactions using NanoLuc Binary Technology  
399 (NanoBiT, Promega), Atg32 fused to 3 copies of GFP and Large BiT (LgBiT; 17.6 kDa), and  
400 Atg11 fused to Small BiT (SmBiT; 11 amino acids) were expressed endogenously (constructed  
401 by Yang Liu, Osaka University, Japan). Upon interaction of Atg32 and Atg11 with each other,  
402 SmBiT and LgBiT are brought into close proximity, leading to structural complementation and  
403 generation of a luminescent signal. For the assay, cells were grown in glycerol media (SDGCA).  
404 1.0 OD<sub>600</sub> units of cells were collected in the early phase of respiration (OD<sub>600</sub>: 1.4~1.6) and  
405 washed with 400 µl PBS. After washing, cells were dissolved in 40 µl PBS and applied to a 96  
406 well plate. The detection reagent was prepared by diluting the Nano-Glo Live Cell Substrate  
407 (Promega, 0000360026) with the Nano-Glo LCS Dilution Buffer (Promega, 0000333050) to  
408 make the Nano-Glo Live Cell Reagent. 10 µl diluted detection reagent was added onto the 96 well

409 plate and mixed with the cells. Then, cells were incubated at 37°C for 1 hour. After incubation,  
410 the luminescent signal was detected by the microplate reader (Fluoroskan Ascent FL; Thermo  
411 Fisher Scientific) (exposure time: 1,000 ms). For the detection of the GFP fluorescent signal  
412 derived from Atg32, 1.0 OD<sub>600</sub> units of cells were collected at the same time point, and dissolved  
413 in 100 µl SDGCA media, applied to the 96 well plate. GFP signal was measured by microplate  
414 reader (Fluoroskan Ascent FL; Thermo Fisher Scientific) (excitation: 485 nm, emission: 538 nm,  
415 exposure time: 1,000 ms), and used to normalize the luminescence intensity.

416

#### 417 **Statistical analysis**

418 Results are presented as means including  $\pm$  standard deviation. Statistical analyses were  
419 performed with Excel for Mac (Microsoft) and GraphPad Prism 9 (GraphPad Software), using  
420 two-tailed Student's *t*-test and one-way ANOVA followed by Tukey's or Dunnett's multiple  
421 comparison test. All the statistical tests performed are indicated in the figure legends.

422

#### 423 **Online supplemental material**

424 [Fig. S1](#) shows a schematic description on the NanoBiT assays for Atg32-Atg11 interactions, and  
425 the results on Atg32-Atg11 interactions and mitophagy in *get1/2*-null cells expressing a  
426 catalytically inactive Ppg1 mutant. [Fig. S2](#) contains the data from microscopic imaging,  
427 mitophagy assay, and processing assay for cells expressing Far8-3×GFP and mito-DHFR-  
428 mCherry. [Fig. S3](#) shows the results on Atg32-Atg11 interactions and mitophagy in *get1/2*-null  
429 cells lacking Far10. [Fig. S4](#) contains the data from microscopic imaging for *get1/2*-null cells  
430 expressing an artificially ER-anchored Far9. [Fig. S5](#) shows the results on mitophagy in cells  
431 expressing a catalytically inactive Ppg1 mutant and an ectopically mitochondria-targeted Far9/10.  
432 [Table S1](#) contains a list of yeast strains used in this study. [Table S2](#) shows a list of plasmid used

433 in this study.

434

#### 435 **Acknowledgements**

436 We thank Miyuki Sato (Gunma University, Japan) for valuable suggestions on artificial ER  
437 anchoring, Elmar Schiebel (Heidelberg University, Germany) for kindly providing us with the  
438 plasmid pFA6a-3myeGFP-kanMX6, and Yang Liu (Osaka University, Japan) for providing us  
439 with the NanoBiT assay strains. This work was supported in part by JSPS KAKENHI Grants  
440 JP19J10384, JP21K15041 (to M.O.), JP16H04784, JP19H03222, and JP20H05324 (to KO), and  
441 the Osaka University International Joint Research Promotion Programs (Type A+ and Type A-  
442 GKP) (to KO).

443

444 The authors declare no competing financial interests.

445

446 Author contributions: M. Onishi and K. Okamoto obtained funding and conceptualized the study.  
447 M. Onishi and K. Okamoto designed experiments. M. Onishi performed experiments. M. Onishi  
448 and K. Okamoto wrote the manuscript.

449

#### 450 **References**

451 Aoki, Y., T. Kanki, Y. Hirota, Y. Kurihara, T. Saigusa, T. Uchiumi, and D. Kang. 2011.  
452 Phosphorylation of Serine 114 on Atg32 mediates mitophagy. *Mol. Biol. Cell.* 22:3206-3217.  
453 Barlowe, C.K., and E.A. Miller. 2013. Secretory protein biogenesis and traffic in the early  
454 secretory pathway. *Genetics.* 193:383-410.  
455 Bozkurt, G., G. Stjepanovic, F. Vilardi, S. Amlacher, K. Wild, G. Bange, V. Favalaro, K. Rippe,  
456 E. Hurt, B. Dobberstein, and I. Sinning. 2009. Structural insights into tail-anchored protein

- 457 binding and membrane insertion by Get3. *Proc. Natl. Acad. Sci. U S A.* 106:21131-21136.
- 458 Calvelli, H., J. Krigman, M. Onishi, D.P. Narendra, N. Sun, and K. Okamoto. 2020. Detection of  
459 mitophagy in mammalian cells, mice, and yeast. *Methods Cell Biol.* 155:557-579.
- 460 Chen, Y.C., G.K. Umanah, N. Dephoure, S.A. Andrabi, S.P. Gygi, T.M. Dawson, V.L. Dawson,  
461 and J. Rutter. 2014. Msp1/ATAD1 maintains mitochondrial function by facilitating the  
462 degradation of mislocalized tail-anchored proteins. *EMBO J.* 33:1548-1564.
- 463 d'Enfert C, C. Barlowe, S. Nishikawa, A. Nakano, R. Schekman. 1991. Structural and functional  
464 dissection of a membrane glycoprotein required for vesicle budding from the endoplasmic  
465 reticulum. *Mol Cell Biol.* 11:5727-5734.
- 466 Denic, V. 2012. A portrait of the GET pathway as a surprisingly complicated young man. *Trends*  
467 *Biochem. Sci.* 37:411-417.
- 468 Denic, V., V. Dotsch, and I. Sinning. 2013. Endoplasmic reticulum targeting and insertion of tail-  
469 anchored membrane proteins by the GET pathway. *Cold Spring Harb. Perspect. Biol.*  
470 5:a013334.
- 471 Dixon, A.S., M.K. Schwinn, M.P. Hall, K. Zimmerman, P. Otto, T.H. Lubben, B.L. Butler, B.F.  
472 Binkowski, T. Machleidt, T.A. Kirkland, M.G. Wood, C.T. Eggers, L.P. Encell, and K.V.  
473 Wood. 2016. NanoLuc complementation reporter optimized for accurate measurement of  
474 protein interactions in cells. *ACS. Chem. Biol.* 11:400-408.
- 475 Farkas, A., and K.E. Bohnsack. 2021. Capture and delivery of tail-anchored proteins to the  
476 endoplasmic reticulum. *J. Cell Biol.* 220:e202105004.
- 477 Feldheim D, J. Rothblatt, and R. Schekman. 1992. Topology and functional domains of Sec63p,  
478 an endoplasmic reticulum membrane protein required for secretory protein translocation. *Mol*  
479 *Cell Biol.* 12:3288-3296.
- 480 Frederick, R.L., J.M. McCaffery, K.W. Cunningham, K. Okamoto, and J.M. Shaw. 2004. Yeast

- 481 Miro GTPase, Gem1p, regulates mitochondrial morphology via a novel pathway. *J. Cell Biol.*  
482 167:87-98.
- 483 Furukawa, K., T. Fukuda, S. Yamashita, T. Saigusa, Y. Kurihara, Y. Yoshida, H. Kirisako, H.  
484 Nakatogawa, and T. Kanki. 2018. The PP2A-like protein phosphatase Ppg1 and the Far  
485 complex cooperatively counteract CK2-mediated phosphorylation of Atg32 to inhibit  
486 mitophagy. *Cell Rep.* 23:3579-3590.
- 487 He, C., H. Song, T. Yorimitsu, I. Monastyrska, W.L. Yen, J.E. Legakis, and D.J. Klionsky. 2006.  
488 Recruitment of Atg9 to the preautophagosomal structure by Atg11 is essential for selective  
489 autophagy in budding yeast. *J. Cell Biol.* 175:925-935.
- 490 Innokentev, A., K. Furukawa, T. Fukuda, T. Saigusa, K. Inoue, S.I. Yamashita, and T. Kanki.  
491 2020. Association and dissociation between the mitochondrial Far complex and Atg32 regulate  
492 mitophagy. *elife.* 9:e63694.
- 493 Jonikas, M., S. Collins, V. Denic, E. Oh, E. Quan, V. Schmid, J. Weibezahn, B. Schwappach, P.  
494 Walter, J. Weissman, and M. Schuldiner. 2009. Comprehensive characterization of genes  
495 required for protein folding in the endoplasmic reticulum. *Science.* 323:1693–1697.
- 496 Kanki, T., Y. Kurihara, X. Jin, T. Goda, Y. Ono, M. Aihara, Y. Hirota, T. Saigusa, Y. Aoki, T.  
497 Uchiumi, and D. Kang. 2013. Casein kinase 2 is essential for mitophagy. *EMBO Rep.* 14:788-  
498 794.
- 499 Kanki, T., K. Wang, Y. Cao, M. Baba, and D.J. Klionsky. 2009. Atg32 is a mitochondrial protein  
500 that confers selectivity during mitophagy. *Dev. Cell.* 17:98-109.
- 501 Kemp, H.A., and G.F. Sprague, Jr. 2003. Far3 and five interacting proteins prevent premature  
502 recovery from pheromone arrest in the budding yeast *Saccharomyces cerevisiae*. *Mol. Cell*  
503 *Biol.* 23:1750-1763.
- 504 Kondo-Okamoto, N., N.N. Noda, S.W. Suzuki, H. Nakatogawa, I. Takahashi, M. Matsunami, A.

505 Hashimoto, F. Inagaki, Y. Ohsumi, and K. Okamoto. 2012. Autophagy-related protein 32 acts  
506 as autophagic degron and directly initiates mitophagy. *J. Biol. Chem.* 287:10631-10638.

507 Mao, K., L.H. Chew, Y. Inoue-Aono, H. Cheong, U. Nair, H. Popelka, C.K. Yip, and D.J.  
508 Klionsky. 2013. Atg29 phosphorylation regulates coordination of the Atg17-Atg31-Atg29  
509 complex with the Atg11 scaffold during autophagy initiation. *Proc. Natl. Acad. Sci. U S A.*  
510 110:E2875-2884.

511 Mateja, A., M. Paduch, H. Chang, A. Szydlowska, A. Kossiakoff, R. Hegde, and R. Keenan. 2015.  
512 Structure of the Get3 targeting factor in complex with its membrane protein cargo. *Science.*  
513 347:1152-1155.

514 Mateja, A., A. Szlachcic, M.E. Downing, M. Dobosz, M. Mariappan, R.S. Hegde, and R.J.  
515 Keenan. 2009. The structural basis of tail-anchored membrane protein recognition by Get3.  
516 *Nature.* 461:361-366.

517 McDowell, M.A., M. Heimes, F. Fiorentino, S. Mehmood, A. Farkas, J. Coy-Vergara, D. Wu,  
518 J.R. Bolla, V. Schmid, R. Heinze, K. Wild, D. Flemming, S. Pfeffer, B. Schwappach, C.V.  
519 Robinson, and I. Sinning. 2020. Structural basis of tail-anchored membrane protein biogenesis  
520 by the GET insertase complex. *Mol. Cell.* 80:72-86.e7.

521 Mochida, K., Y. Oikawa, Y. Kimura, H. Kirisako, H. Hirano, Y. Ohsumi, and H. Nakatogawa.  
522 2015. Receptor-mediated selective autophagy degrades the endoplasmic reticulum and the  
523 nucleus. *Nature.* 522:359-362.

524 Okamoto, K., N. Kondo-Okamoto, and Y. Ohsumi. 2009. Mitochondria-anchored receptor Atg32  
525 mediates degradation of mitochondria via selective autophagy. *Dev. Cell.* 17:87-97.

526 Okreglak, V., and P. Walter. 2014. The conserved AAA-ATPase Msp1 confers organelle  
527 specificity to tail-anchored proteins. *Proc. Natl. Acad. Sci. U S A.* 111:8019-8024.

528 Onishi, M., S. Nagumo, S. Iwashita, and K. Okamoto. 2018. The ER membrane insertase Get1/2

529 is required for efficient mitophagy in yeast. *Biochem. Biophys. Res. Commun.* 503:14-20.

530 Onishi, M., and K. Okamoto. 2021. Mitochondrial clearance: mechanisms and roles in cellular  
531 fitness. *FEBS Lett.* 595:1239-1263.

532 Onishi, M., K. Yamano, M. Sato, N. Matsuda, and K. Okamoto. 2021. Molecular mechanisms  
533 and physiological functions of mitophagy. *EMBO J.* 40:e104705.

534 Palikaras, K., E. Lionaki, and N. Tavernarakis. 2018. Mechanisms of mitophagy in cellular  
535 homeostasis, physiology and pathology. *Nat. Cell Biol.* 20:1013-1022.

536 Pracheil, T., and Z. Liu. 2013. Tiered assembly of the yeast Far3-7-8-9-10-11 complex at the  
537 endoplasmic reticulum. *J. Biol. Chem.* 288:16986-16997.

538 Pracheil, T., J. Thornton, and Z. Liu. 2012. TORC2 signaling is antagonized by protein  
539 phosphatase 2A and the Far complex in *Saccharomyces cerevisiae*. *Genetics.* 190:1325-1339.

540 Schuldiner, M., J. Metz, V. Schmid, V. Denic, M. Rakwalska, H.D. Schmitt, B. Schwappach, and  
541 J.S. Weissman. 2008. The GET complex mediates insertion of tail-anchored proteins into the  
542 ER membrane. *Cell.* 134:634-645.

543 Stefer, S., S. Reitz, F. Wang, K. Wild, Y. Pang, D. Schwarz, J. Bomke, C. Hein, F. Löhr, F.  
544 Bernhard, V. Denic, V. Dötsch, and I. Sinning. 2011. Structural basis for tail-anchored  
545 membrane protein biogenesis by the Get3-receptor complex. *Science.* 333:758-762.

546 Suloway, C.J., J.W. Chartron, M. Zaslaver, and W.M. Clemons, Jr. 2009. Model for eukaryotic  
547 tail-anchored protein binding based on the structure of Get3. *Proc. Natl. Acad. Sci. U S A.*  
548 106:14849-14854.

549 Wang, F., C. Chan, N.R. Weir, and V. Denic. 2014. The Get1/2 transmembrane complex is an  
550 endoplasmic-reticulum membrane protein insertase. *Nature.* 512:441-444.

551 Wang, F., A. Whynot, M. Tung, and V. Denic. 2011. The mechanism of tail-anchored protein  
552 insertion into the ER membrane. *Mol. Cell.* 43:738-750.

553 Wang, L., A. Myasnikov, X. Pan, and P. Walter. 2020. Structure of the AAA protein Msp1 reveals  
554 mechanism of mislocalized membrane protein extraction. *elife*. 9:e54031.

555 Wohlever, M.L., A. Mateja, P.T. McGilvray, K.J. Day, and R.J. Keenan. 2017. Msp1 is a  
556 membrane protein dislocase for tail-anchored proteins. *Mol. Cell*. 67:194-202.e6.

557 Yamagata, A., H. Mimura, Y. Sato, M. Yamashita, A. Yoshikawa, and S. Fukai. 2010. Structural  
558 insight into the membrane insertion of tail-anchored proteins by Get3. *Genes Cells*. 15:29-41.

559 Zhang, J., Y. Wang, Z. Chi, M.J. Keuss, Y.M. Pai, H.C. Kang, J.H. Shin, A. Bugayenko, H. Wang,  
560 Y. Xiong, M.V. Pletnikov, M.P. Mattson, T.M. Dawson, and V.L. Dawson. 2011. The AAA+  
561 ATPase Thorase regulates AMPA receptor-dependent synaptic plasticity and behavior. *Cell*.  
562 145:284-299.

563

564

565

566

567

568

569

570

571

572

573

574

575

576



577 **Figure legends**

578 **Figure 1. Atg32 phosphorylation and Atg32-Atg11 interactions are reduced in cells lacking**

579 **Get components. (A)** Wild-type, *get1Δ*, *get2Δ*, and *get3Δ* cells containing a plasmid encoding

580 Atg32-3HAn (p-*ATG32-3HAn*) grown in fermentable dextrose medium (Dex) were cultured in

581 non-fermentable glycerol medium (Gly), collected at the indicated OD<sub>600</sub> points, and subjected to

582 western blotting. All strains are *pep4/prb1/atg32*-triple-null derivatives defective in vacuolar

583 degradation of Atg32-3HAn via mitophagy. Atg32 is phosphorylated at the early stages of

584 respiratory growth, and phosphorylated Atg32 molecules are detected as multiple upper protein

585 bands. Orange arrowheads and dots indicate putative phosphorylated Atg32. Pgk1 was monitored

586 as a loading control. **(B)** *pep4Δ prb1Δ atg32Δ* and *pep4Δ prb1Δ atg32Δ get1Δ* cells containing a

587 plasmid encoding Atg32-HAn were grown in glycerol medium, collected at the OD<sub>600</sub> = 2.5 point,

588 and subjected to alkaline lysis and TCA precipitation. The pellet was resuspended in a reaction

589 buffer, treated with or without lambda protein phosphatase ( $\lambda$ -PPase) in the presence or absence

590 of PPase inhibitor. **(C)** Wild-type, *get1Δ*, *get2Δ* and *get3Δ* cells expressing Atg32 internally

591 tagged with 3×GFP plus Large BiT (LgBiT) and Atg11 C-terminally tagged with Small BiT

592 (SmBiT) or wild-type cells expressing Atg32 and Atg11 (negative control, N.C.), were grown in

593 glycerol medium, collected at the OD<sub>600</sub> = 1.4 point, incubated with substrates, and subjected to

594 the NanoBiT-based bioluminescence assay. Data represent the averages of all experiments, with

595 bars indicating standard deviations ( $n = 5$  independent cultures). Data were analyzed by one-way

596 analysis of variance (ANOVA) with Dunnett's multiple comparison test.

597

598 **Figure 2. Perturbation of the Ppg1 phosphatase restores Atg32-Atg11 interactions and**

599 **mitophagy in *get1/2*-null cells. (A)** Wild-type, *ppg1Δ*, *get1Δ*, *get2Δ*, *get1Δ ppg1Δ*, and *get2Δ*

600 *ppg1Δ* cells expressing Atg32-3HA-3×GFP-3FLAG-LgBiT and Atg11-HA-SmBiT, or wild-type

601 cells expressing Atg32 and Atg11 (negative control, N.C.) were grown in glycerol medium (Gly),  
602 collected at the  $OD_{600} = 1.4$  point, incubated with substrates, and subjected to the NanoBiT-based  
603 bioluminescence assay. Data represent the averages of all experiments, with bars indicating  
604 standard deviations ( $n = 3$  independent cultures). **(B)** Wild-type, *ppg1* $\Delta$ , *get1* $\Delta$ , *get2* $\Delta$ , *get1* $\Delta$   
605 *ppg1* $\Delta$ , *get2* $\Delta$  *ppg1* $\Delta$ , and *atg32* $\Delta$  cells expressing mitochondrial matrix-targeted DHFR-mCherry  
606 (mito-DHFR-mCherry) were grown in glycerol medium (Gly), collected at the indicated time  
607 points, and subjected to western blotting. Generation of free mCherry indicates transport of  
608 mitochondria to the vacuole. **(C)** The amounts of free mCherry in cells analyzed in **(B)** was  
609 quantified in three experiments. The signal intensity value of free mCherry in wild-type cells at  
610 the 72 h time point was set to 100%. Data represent the averages of all experiments, with bars  
611 indicating standard deviations ( $n = 3$  independent cultures). **(D)** Wild-type and *get1* $\Delta$  cells  
612 expressing Atg11-HA-SmBiT and Atg32-3HA-3 $\times$ GFP-3FLAG-LgBiT or ( $\Delta$ 151-200)-3HA-  
613 3 $\times$ GFP-3FLAG-LgBiT, or wild-type cells expressing Atg32 and Atg11 (negative control, N.C.)  
614 were grown in glycerol medium (Gly), collected at the  $OD_{600} = 1.4$  point, incubated with  
615 substrates, and subjected to the NanoBiT-based bioluminescence assay. Data represent the  
616 averages of all experiments, with bars indicating standard deviations ( $n = 3$  independent cultures).  
617 **(E)** Wild-type, *get1* $\Delta$ , and *get2* $\Delta$  cells expressing chromosomally integrated *ATG32* wild-type or  
618 *ATG32* ( $\Delta$ 151-200) were grown in glycerol medium (Gly), collected at the indicated time points,  
619 and subjected to western blotting. **(F)** The amounts of free mCherry in cells analyzed in **(E)** was  
620 quantified in four experiments. The signal intensity value of free mCherry in wild-type cells at  
621 the 72 h time point was set to 100%. Data represent the averages of all experiments, with bars  
622 indicating standard deviations ( $n = 4$  independent cultures). Data were analyzed by two-tailed  
623 Student's *t* test **(A, C, D, F)**.

624

625 **Figure 3. The ER-resident Far complex predominantly targets to mitochondria in GET-**  
626 **deficient cells. (A)** Representative images of wild-type and *get1Δ* cells expressing Sec63-  
627 mCherry and Far8-3×GFP grown for 24 h in glycerol medium (Gly) and observed by structured  
628 illumination microscopy. Arrowheads indicate Far8-3×GFP localized to mitochondria. Scale bar,  
629 2 μm. DIC, differential interference contrast. **(B)** Cells analyzed in **(A)** were quantified in three  
630 experiments. Data represent the averages of all experiments, with bars indicating standard  
631 deviations (*n* = 3 independent cultures). **(C)** Representative images of wild-type and *get1Δ* cells  
632 expressing mito-DHFR-mCherry and Far8-3×GFP grown for 24 h in glycerol medium (Gly) and  
633 observed by structured illumination microscopy. Scale bar, 2 μm. **(D)** Cells analyzed in **(C)** were  
634 quantified in three experiments. Data represent the averages of all experiments, with bars  
635 indicating standard deviations (*n* = 3 independent cultures). **(E)** Representative images of wild-  
636 type, *far9Δ*, *far10Δ*, *get1Δ*, *get1Δ far9Δ*, and *get1Δ far10Δ* cells expressing Sec63-mCherry and  
637 Far8-3×GFP3 grown for 24 h in glycerol medium (Gly) and observed by structured illumination  
638 microscopy. Scale bar, 2 μm. **(F)** Cells analyzed in **(E)** were quantified in three experiments. Data  
639 represent the averages of all experiments, with bars indicating standard deviations. Data were  
640 analyzed by two-tailed Student's *t* test **(B, D)**.

641

642 **Figure 4. Loss of the Far9/10 TA proteins rescues mitophagic deficiencies in cells lacking**  
643 **Get1/2. (A)** Wild-type, *far9Δ*, *get1Δ*, *get2Δ*, *get1Δ far9Δ*, and *get2Δ far9Δ* cells expressing  
644 Atg32-3HA-3×GFP-3FLAG-LgBiT and Atg11-HA-SmBiT, or wild-type cells expressing Atg32  
645 and Atg11 (negative control, N.C.) were grown in glycerol medium (Gly), collected at the OD<sub>600</sub>  
646 = 1.4 point, incubated with substrates, and subjected to the NanoBiT-based bioluminescence assay.  
647 Data represent the averages of all experiments, with bars indicating standard deviations (*n* = 3  
648 independent cultures). **(B)** Wild-type, *far9Δ*, *get1Δ*, *get2Δ*, *get1Δ far9Δ*, *get2Δ far9Δ*, and *atg32Δ*

649 cells expressing mito-DHFR-mCherry were grown in glycerol medium (Gly), collected at the  
650 indicated time points, and subjected to western blotting. **(C)** The amounts of free mCherry in cells  
651 analyzed in **(B)** was quantified in three experiments. The signal intensity value of free mCherry  
652 in wild-type cells at the 72 h time point was set to 100%. Data represent the averages of all  
653 experiments, with bars indicating standard deviations ( $n = 3$  independent cultures). Data were  
654 analyzed by two-tailed Student's  $t$  test **(A, C)**.

655

656 **Figure 5. Artificial ER anchoring of the Far complex increases Atg32-Atg11 interactions and**  
657 **mitophagy in *get1/2*-null cells. (A)** Representative images of wild-type, *get1* $\Delta$ , and *get2* $\Delta$  cells  
658 expressing the endogenous Far9 or a variant whose TA domain was replaced with the Sec12 TM  
659 domain (*FAR9-TM<sup>ER</sup>*) grown for 24 h in glycerol medium (Gly) and observed by structured  
660 illumination microscopy. All strains were derivatives expressing Sec63-mCherry and Far8-3 $\times$ GFP.  
661 Scale bar, 2  $\mu$ m. **(B)** Cells analyzed in **(A)** were quantified in three experiments. Data represent  
662 the averages of all experiments, with bars indicating standard deviations ( $n = 3$  independent  
663 cultures). **(C)** Derivatives of cells analyzed in **(D)** expressing Atg32-3HA-3 $\times$ GFP-3FLAG-LgBiT  
664 and Atg11-HA-SmBiT, or wild-type cells expressing Atg32 and Atg11 (negative control, N.C.),  
665 were grown in glycerol medium (Gly), collected at the  $OD_{600} = 1.4$  point, incubated with  
666 substrates, and subjected to the NanoBiT-based bioluminescence assay. Data represent the  
667 averages of all experiments, with bars indicating standard deviations ( $n = 4$  independent cultures).  
668 **(D)** Wild-type, *get1* $\Delta$ , *get2* $\Delta$  and *atg32* $\Delta$  cells expressing mito-DHFR-mCherry and wild-type  
669 *FAR9* or *FAR9-TM<sup>ER</sup>* were grown in glycerol medium (Gly), collected at the indicated time points,  
670 and subjected to western blotting. **(E)** The amounts of free mCherry in cells analyzed in **(D)** were  
671 quantified in three experiments. The signal intensity value of free mCherry in wild-type cells at  
672 the 72 h time point was set to 100%. Data represent the averages of all experiments, with bars

673 indicating standard deviations ( $n = 3$  independent cultures). Data were analyzed by two-tailed  
674 Student's  $t$  test (**B, C, E**).

675

676 **Figure 6. Artificial mitochondrial anchoring of the Far complex partially reduces mitophagy.**

677 **(A)** Representative images of wild-type, *get1Δ*, and *get2Δ* cells expressing the endogenous  
678 Far9/10 or a variant whose TA domains were replaced with the Gem1 TM domain (*FAR9/FAR10-*  
679 *TM<sup>MITO</sup>*) grown for 24 h in glycerol medium (Gly) and observed by structured illumination  
680 microscopy. All strains were derivatives expressing mito-DHFR-mCherry and Far8-3×GFP. Scale  
681 bar, 2 μm. **(B)** Cells analyzed in **(A)** were quantified in three experiments. Data represent the  
682 averages of all experiments, with bars indicating standard deviations ( $n = 3$  independent cultures).  
683 **(C)** Wild-type, *get1Δ*, *get2Δ*, and *atg32Δ* cells expressing mito-DHFR-mCherry and the  
684 endogenous Far9/10 or Far9/Far10-TA<sup>MITO</sup> were grown in glycerol medium (Gly), collected at the  
685 indicated time points, and subjected to western blotting. **(D)** The amounts of free mCherry in cells  
686 analyzed in **(C)** were quantified in three experiments. The signal intensity value of free mCherry  
687 in wild-type cells at the 72 h time point was set to 100%. Data represent the averages of all  
688 experiments, with bars indicating standard deviations ( $n = 3$  independent cultures). Data were  
689 analyzed by one-way ANOVA with Dunnett's multiple comparison test (**B, D**).

690

691 **Figure 7. Msp1 is required for efficient mitophagy in cells lacking Get3.** **(A)** Wild-type, *msp1Δ*,

692 *get3Δ*, *msp1Δ get3Δ*, the endogenous *MSP1*-expressing or *MSP1 E193Q* (*MSP1EQ*)-expressing

693 *get3Δ*, and *atg32Δ* cells were grown in glycerol medium (Gly), collected at the indicated time

694 points, and subjected to western blotting. All strains were derivatives expressing mito-DHFR-

695 mCherry. **(B)** The amount of free mCherry in cells analyzed in **(A)** was quantified in three

696 experiments. The signal intensity value of free mCherry in wild-type cells at the 72 h time point

697 was set to 100%. Data represent the averages of all experiments, with bars indicating standard  
698 deviations ( $n = 3$  independent cultures). **(C)** Representative images of wild-type, *msp1* $\Delta$ , *get3* $\Delta$ ,  
699 and *msp1* $\Delta$  *get3* $\Delta$  cells expressing mito-DHFR-mCherry and Far8-3 $\times$ GFP grown for 24 h in  
700 glycerol medium (Gly) and observed by structured illumination microscopy. Scale bar, 2  $\mu$ m. **(D)**  
701 Cells analyzed in **(C)** were quantified in three experiments. Data represent the averages of all  
702 experiments, with bars indicating standard deviations ( $n = 3$  independent cultures). **(E)** Wild-type,  
703 *ppg1* $\Delta$ , *msp1* $\Delta$ , *get3* $\Delta$ , *msp1* $\Delta$  *ppg1* $\Delta$ , *get3* $\Delta$  *ppg1* $\Delta$ , *msp1* $\Delta$  *get3* $\Delta$ , *msp1* $\Delta$  *get3* $\Delta$  *ppg1* $\Delta$ , and  
704 *atg32* $\Delta$  cells expressing mito-DHFR-mCherry were grown in glycerol medium (Gly), collected  
705 at the indicated time points, and subjected to western blotting. **(F)** The amount of free mCherry  
706 in cells analyzed in **(E)** was quantified in three experiments. The signal intensity value of free  
707 mCherry in wild-type cells at the 72 h time point was set to 100%. Data represent the averages of  
708 all experiments, with bars indicating standard deviations ( $n = 3$  independent cultures). Data were  
709 analyzed by one-way ANOVA with Dunnett's multiple comparison test **(B)**, or two-tailed  
710 Student's *t* test **(F)**.

711

712 **Figure 8. A hypothetical model for activation of Atg32-mediated mitophagy. (Upper panel)**

713 Under mitophagy-noninducing (fermentable) conditions, a substantial fraction of the Ppg1-Far  
714 complex escapes the GET pathway that may have reduced levels, activity, and/or affinity,  
715 localizes to mitochondria, and suppress Atg32 phosphorylation and Atg32-Atg11 interactions.

716 Mitochondria-anchored Ppg1-Far can be extracted from the OMM via Msp1. **(Lower panel)**

717 Under mitophagy-inducing (non-fermentable) conditions, the GET pathway efficiently mediates  
718 targeting of the Ppg1-Far complex to the ER, which in turn promotes Atg32 phosphorylation and  
719 Atg32-Atg11 interactions. Msp1-dependent extraction of mitochondria-anchored Ppg1-Far from  
720 the OMM may be enhanced by unknown mechanisms, contributing to activation of mitophagy.

25 **Figure legends**

26 **Figure S1. Expression of a catalytically inactive Ppg1 mutant restores Atg32-Atg11**  
27 **interactions and mitophagy in *get1/2*-null cells. (A)** A schematic illustration of the NanoBiT  
28 system using cells expressing Atg32-3HA-3×GFP-3FLAG-LgBiT and Atg11-HA-SmBiT. Upon  
29 mitophagy induction, Atg32 interacts with Atg11, bringing each luminescent subunit into close  
30 proximity to form a functional unit that releases a luminescent signal, which is detected by a  
31 microplate reader. **(B)** Derivatives of cells analyzed in **(C)** expressing Atg32-3HA-3×GFP-  
32 3FLAG-LgBiT and Atg11-HA-SmBiT, or wild-type cells expressing Atg32 and Atg11 (negative  
33 control, N.C.), were grown in glycerol medium (Gly), collected at the  $OD_{600} = 1.4$  point, incubated  
34 with substrates, and subjected to the NanoBiT-based bioluminescence assay. Data represent the  
35 averages of all experiments, with bars indicating standard deviations ( $n = 3$  independent cultures).  
36 **(C)** Wild-type, *get1*Δ, and *get2*Δ cells containing chromosomally integrated wild-type *PPG1* or  
37 *PPG1 H111N* were grown in glycerol medium (Gly), collected at the indicated time points, and  
38 subjected to western blotting. **(D)** The amounts of free mCherry in cells analyzed in **(C)** was  
39 quantified in three experiments. The signal intensity value of free mCherry in wild-type cells at  
40 the 72 h time point was set to 100%. Data represent the averages of all experiments, with bars  
41 indicating standard deviations ( $n = 3$  independent cultures). Data were analyzed by two-tailed  
42 Student's *t* test **(B, D)**.

43

44 **Figure S2. ER localization of the Far complex is perturbed in GET-deficient cells. (A)**  
45 Representative images of wild-type, *get2*Δ, and *get3*Δ cells expressing mito-DHFR-mCherry and  
46 Far8-3×GFP grown for 24 h in glycerol medium (Gly) and observed by structured illumination  
47 microscopy. Scale bar, 2 μm. The percentage of cells exhibiting mitochondria-localized Far8-  
48 3×GFP is depicted. **(B)** Representative images of wild-type cells expressing the endogenous

49 *GET1/2*, chromosomally integrated *GET1 NRm* (*N72A*, *R73A*), or a *GET2 RERRm* (*R14E*, *E15R*,  
50 *R16E*, *R17E*) grown for 24 h in glycerol medium (Gly) and observed by structured illumination  
51 microscopy. All strains were derivatives expressing mito-DHFR-mCherry and Far8-3×GFP. Scale  
52 bar, 2 μm. The percentage of cells exhibiting mitochondria-localized Far8-3×GFP is depicted. **(C)**  
53 Wild-type, *get1Δ*, *get2Δ*, or cells expressing chromosomally integrated *GET1 NRm* or *GET2*  
54 *RERRm*, and *atg32Δ* cells were grown in glycerol medium (Gly), collected at the indicated time  
55 points, and subjected to western blotting. **(D)** The amounts of free mCherry in cells analyzed in  
56 **(C)** was quantified in three experiments. The signal intensity value of free mCherry in wild-type  
57 cells at the 72 h time point was set to 100%. Data represent the averages of all experiments, with  
58 bars indicating standard deviations ( $n = 3$  independent cultures). **(E)** Wild-type, *atg32Δ*, *atg39Δ*  
59 *atg40Δ*, and *atg32Δ atg39Δ atg40Δ* cells expressing mito-DHFR-mCherry and Far8-3×GFP were  
60 grown in glycerol medium (Gly), collected at the indicated time points, and subjected to western  
61 blotting. Generation of free GFP indicates transport of Far8 to the vacuole. **(F)** The amount of  
62 free GFP in cells analyzed in **(E)** was quantified in three experiments. The signal intensity value  
63 of free GFP in wild-type cells at the 72 h time point was set to 100%. Data represent the averages  
64 of all experiments, with bars indicating standard deviations ( $n = 3$  independent cultures). Data  
65 were analyzed by one-way ANOVA with Dunnett's multiple comparison test **(D)** or Tukey's  
66 multiple comparison test **(F)**.

67

68 **Figure S3. Loss of Far10 significantly ameliorates mitophagic deficiencies in the absence of**  
69 **Get1/2. (A)** Wild-type, *far10Δ*, *get1Δ*, *get2Δ*, *get1Δ far10Δ*, and *get2Δ far10Δ* cells expressing  
70 Atg32-3HA-3×GFP-3FLAG-LgBiT and Atg11-HA-SmBiT, or wild-type cells expressing Atg32  
71 and Atg11 (negative control, N.C.) were grown in glycerol medium (Gly), collected at the  $OD_{600}$   
72 = 1.4 point, incubated with substrates, and subjected to the NanoBiT-based bioluminescence assay.



73 Data represent the averages of all experiments, with bars indicating standard deviations ( $n = 3$   
74 independent cultures). **(B)** Wild-type, *far10* $\Delta$ , *get1* $\Delta$ , *get2* $\Delta$ , *get1* $\Delta$  *far10* $\Delta$ , *get2* $\Delta$  *far10* $\Delta$ , and  
75 *atg32* $\Delta$  cells expressing mito-DHFR-mCherry were grown in glycerol medium (Gly), collected  
76 at the indicated time points, and subjected to western blotting. **(C)** The amount of free mCherry  
77 in cells analyzed in **(B)** was quantified in six experiments. The signal intensity value of free  
78 mCherry in wild-type cells at the 72 h time point was set to 100%. Data represent the averages of  
79 all experiments, with bars indicating standard deviations ( $n = 6$  independent cultures). Data were  
80 analyzed by two-tailed Student's *t* test **(A, C)**.

81

82 **Figure S4. Artificial ER anchoring of the Far complex in *get1/2*-null cells.** **(A)** Representative  
83 images of wild-type, *get1* $\Delta$ , and *get2* $\Delta$  cells expressing the endogenous Far9 or a variant whose  
84 TA domain was replaced with the Sec12 TM domain (*FAR9-TM<sup>ER</sup>*) grown for 24 h in glycerol  
85 medium (Gly) and observed by structured illumination microscopy. All strains were derivatives  
86 expressing mito-DHFR-mCherry and Far8-3 $\times$ GFP. Scale bar, 2  $\mu$ m. **(B)** Cells analyzed in **(A)**  
87 were quantified in three experiments. Data represent the averages of all experiments, with bars  
88 indicating standard deviations. Data were analyzed by two-tailed Student's *t* test **(B)**.

89

90 **Figure S5. Suppression of mitophagy by artificially mitochondria-anchored Ppg1-Far and**  
91 **restoration of mitophagy in *get3/msp1*-double-null cells expressing a Atg32 variant defective**  
92 **in Ppg1-Far interaction.** **(A)** Wild-type cells expressing the endogenous *FAR9* and *PPG1* or  
93 chromosomally integrated *FAR9/FAR10-TA<sup>MITO</sup>* and *PPG1 H111N* were grown in glycerol  
94 medium (Gly), collected at the indicated time points, and subjected to western blotting. **(B)** The  
95 amounts of free mCherry in cells analyzed in **(A)** were quantified in three experiments. The signal  
96 intensity value of free mCherry in wild-type cells at the 72 h time point was set to 100%. Data

97 represent the averages of all experiments, with bars indicating standard deviations ( $n = 3$   
98 independent cultures). Data were analyzed by two-tailed Student's  $t$  test **(B)**. **(C)** Wild-type,  
99 *msp1* $\Delta$ , *get3* $\Delta$ , and *msp1* $\Delta$  *get3* $\Delta$  cells expressing the endogenous *ATG32* or chromosomally  
100 integrated *ATG32*( $\Delta 151-200$ ) were grown in glycerol medium (Gly), collected at the indicated  
101 time points, and subjected to western blotting. **(D)** The amounts of free mCherry in cells analyzed  
102 in **(C)** were quantified in three experiments. The signal intensity value of free mCherry in wild-  
103 type cells at the 72 h time point was set to 100%. Data represent the averages of all experiments,  
104 with bars indicating standard deviations ( $n = 3$  independent cultures). Data were analyzed by two-  
105 tailed Student's  $t$  test **(B and D)**.

**Table S1. Yeast strains used in this study**

| Strain name | Genotype                                                                                                                                             | Source |
|-------------|------------------------------------------------------------------------------------------------------------------------------------------------------|--------|
| BY4741      | <i>his3Δ1 leu2Δ0 met15Δ0 ura3Δ0</i>                                                                                                                  | (1)    |
| KOY1387     | BY4741 <i>TEF<sup>P</sup>-mito-DHFR-mCherry::CgHIS3</i>                                                                                              |        |
| KOY1422     | BY4741 <i>TEF<sup>P</sup>-mito-DHFR-mCherry::CgHIS3 atg32::kanMX6</i>                                                                                |        |
| KOY2928     | BY4741 <i>TEF<sup>P</sup>-mito-DHFR-mCherry::CgHIS3 get2::natNT2</i>                                                                                 |        |
| KOY4146     | BY4741 <i>TEF<sup>P</sup>-mito-DHFR-mCherry::CgHIS3 get1::natNT2</i>                                                                                 |        |
| KOY4594     | BY4741 <i>TEF<sup>P</sup>-mito-DHFR-mCherry::CgHIS3 atg32::KIURA3 atg32::ATG32-3HA</i>                                                               |        |
| KOY4860     | BY4741 <i>TEF<sup>P</sup>-mito-DHFR-mCherry::CgHIS3 msp1::natNT2</i>                                                                                 |        |
| KOY5408     | BY4741 <i>pep4::kanMX6 prb1::hphNT1 atg32::zeoNT3</i>                                                                                                |        |
| KOY5558     | BY4741 <i>pep4::kanMX6 prb1::hphNT1 atg32::zeoNT3 get1::natNT2 [pRS316-ATG32-3HA]</i>                                                                |        |
| KOY5560     | BY4741 <i>pep4::kanMX6 prb1::hphNT1 atg32::zeoNT3 get2::natNT2 [pRS316-ATG32-3HA]</i>                                                                |        |
| KOY5562     | BY4741 <i>pep4::kanMX6 prb1::hphNT1 atg32::zeoNT3 get3::natNT2 [pRS316-ATG32-3HA]</i>                                                                |        |
| KOY6288     | BY4741 <i>TEF<sup>P</sup>-mito-DHFR-mCherry::CgHIS3 get3::natNT2 msp1::KIURA3</i>                                                                    |        |
| KOY6872     | BY4741 <i>TEF<sup>P</sup>-mito-DHFR-mCherry::CgHIS3 ppg1::hphNT1</i>                                                                                 |        |
| KOY6875     | BY4741 <i>TEF<sup>P</sup>-mito-DHFR-mCherry::CgHIS3 get1::natNT2 ppg1::hphNT1</i>                                                                    |        |
| KOY6878     | BY4741 <i>TEF<sup>P</sup>-mito-DHFR-mCherry::CgHIS3 get2::natNT2 ppg1::hphNT1</i>                                                                    |        |
| KOY6996     | BY4741 <i>TEF<sup>P</sup>-mito-DHFR-mCherry::CgHIS3 atg32::KIURA3 ATG11-HA-SmBiT::hphNT1 ATG32-3HA-3×mGFP-3FLAG-LgBiTn</i>                           |        |
| KOY7491     | BY4741 <i>TEF<sup>P</sup>-mito-DHFR-mCherry::CgHIS3 atg32::KIURA3 ATG11-HA-SmBiT::hphNT1 ATG32-3HA-3×mGFP-3FLAG-LgBiTn get1::natNT2</i>              |        |
| KOY7494     | BY4741 <i>TEF<sup>P</sup>-mito-DHFR-mCherry::CgHIS3 atg32::KIURA3 ATG11-HA-SmBiT::hphNT1 ATG32-3HA-3×mGFP-3FLAG-LgBiTn get2::natNT2</i>              |        |
| KOY7497     | BY4741 <i>TEF<sup>P</sup>-mito-DHFR-mCherry::CgHIS3 atg32::KIURA3 ATG11-HA-SmBiT::hphNT1 ATG32-3HA-3×mGFP-3FLAG-LgBiTn ppg1::natNT2</i>              |        |
| KOY7619     | BY4741 <i>TEF<sup>P</sup>-mito-DHFR-mCherry::CgHIS3 atg32::KIURA3 ATG11-HA-SmBiT::hphNT1 ATG32-3HA-3×mGFP-3FLAG-LgBiTn get1::natNT2 ppg1::kanMX6</i> |        |
| KOY7622     | BY4741 <i>TEF<sup>P</sup>-mito-DHFR-mCherry::CgHIS3 atg32::KIURA3 ATG11-HA-SmBiT::hphNT1 ATG32-3HA-3×mGFP-3FLAG-LgBiTn get2::natNT2 ppg1::kanMX6</i> |        |

|         |                                                                                                                                                      |  |
|---------|------------------------------------------------------------------------------------------------------------------------------------------------------|--|
| KOY7629 | BY4741 <i>TEF<sup>P</sup>-mito-DHFR-mCherry::CgHIS3 far9::hphNT1</i>                                                                                 |  |
| KOY7632 | BY4741 <i>TEF<sup>P</sup>-mito-DHFR-mCherry::CgHIS3 get1::natNT2 far9::hphNT1</i>                                                                    |  |
| KOY7635 | BY4741 <i>TEF<sup>P</sup>-mito-DHFR-mCherry::CgHIS3 get2::natNT2 far9::hphNT1</i>                                                                    |  |
| KOY7794 | BY4741 <i>TEF<sup>P</sup>-mito-DHFR-mCherry::CgHIS3 atg32::KIURA3 ATG11-HA-SmBiT::hphNT1 ATG32-3HA-3×mGFP-3FLAG-LgBiTn far9::KIURA3</i>              |  |
| KOY7797 | BY4741 <i>TEF<sup>P</sup>-mito-DHFR-mCherry::CgHIS3 atg32::KIURA3 ATG11-HA-SmBiT::hphNT1 ATG32-3HA-3×mGFP-3FLAG-LgBiTn get1::natNT2 far9::KIURA3</i> |  |
| KOY7805 | BY4741 <i>TEF<sup>P</sup>-mito-DHFR-mCherry::CgHIS3 FAR8-3×GFP::hphNT1</i>                                                                           |  |
| KOY7807 | BY4741 <i>TEF<sup>P</sup>-mito-DHFR-mCherry::CgHIS3 get1::natNT2 FAR8-3×GFP::hphNT1</i>                                                              |  |
| KOY7809 | BY4741 <i>TEF<sup>P</sup>-mito-DHFR-mCherry::CgHIS3 get2::natNT2 FAR8-3×GFP::hphNT1</i>                                                              |  |
| KOY7816 | BY4741 <i>TEF<sup>P</sup>-mito-DHFR-mCherry::CgHIS3 atg32::KIURA3 ATG11-HA-SmBiT::hphNT1 ATG32-3HA-3×mGFP-3FLAG-LgBiTn get3::natNT2</i>              |  |
| KOY7821 | BY4741 <i>SEC63-mCherry::KIURA3 FAR8-3×GFP::hphNT1</i>                                                                                               |  |
| KOY7823 | BY4741 <i>SEC63-mCherry::KIURA3 get1::natNT2 FAR8-3×GFP::hphNT1</i>                                                                                  |  |
| KOY7825 | BY4741 <i>SEC63-mCherry::KIURA3 get2::natNT2 FAR8-3×GFP::hphNT1</i>                                                                                  |  |
| KOY7853 | BY4741 <i>TEF<sup>P</sup>-mito-DHFR-mCherry::CgHIS3 FAR8-3×GFP::hphNT1 atg32::natNT2</i>                                                             |  |
| KOY7862 | BY4741 <i>TEF<sup>P</sup>-mito-DHFR-mCherry::CgHIS3 get1::KIURA3 GET1 FAR8-3×GFP::hphNT1</i>                                                         |  |
| KOY7864 | BY4741 <i>TEF<sup>P</sup>-mito-DHFR-mCherry::CgHIS3 get1::KIURA3 GET1(N72A, R73A) FAR8-3×GFP::hphNT1</i>                                             |  |
| KOY7866 | BY4741 <i>TEF<sup>P</sup>-mito-DHFR-mCherry::CgHIS3 get2::KIURA3 GET2 FAR8-3×GFP::hphNT1</i>                                                         |  |
| KOY7884 | BY4741 <i>TEF<sup>P</sup>-mito-DHFR-mCherry::CgHIS3 get2::KIURA3 GET2(R14E, E15R, R16E, R17E) FAR8-3×GFP::hphNT1</i>                                 |  |
| KOY7905 | BY4741 <i>TEF<sup>P</sup>-mito-DHFR-mCherry::CgHIS3 ppg1::KIURA3 PPG1</i>                                                                            |  |
| KOY7907 | BY4741 <i>TEF<sup>P</sup>-mito-DHFR-mCherry::CgHIS3 ppg1::KIURA3 PPG1(H111N)</i>                                                                     |  |
| KOY7973 | BY4741 <i>TEF<sup>P</sup>-mito-DHFR-mCherry::CgHIS3 ppg1::KIURA3 PPG1 get1::natNT2</i>                                                               |  |
| KOY7976 | BY4741 <i>TEF<sup>P</sup>-mito-DHFR-mCherry::CgHIS3 ppg1::KIURA3 PPG1(H111N) get1::natNT2</i>                                                        |  |

|         |                                                                                                                                                     |  |
|---------|-----------------------------------------------------------------------------------------------------------------------------------------------------|--|
| KOY7979 | BY4741 <i>TEF<sup>P</sup>-mito-DHFR-mCherry::CgHIS3 ppg1::KIURA3 PPG1 get2::natNT2</i>                                                              |  |
| KOY7982 | BY4741 <i>TEF<sup>P</sup>-mito-DHFR-mCherry::CgHIS3 ppg1::KIURA3 PPG1(H111N) get2::natNT2</i>                                                       |  |
| KOY8036 | BY4741 <i>TEF<sup>P</sup>-mito-DHFR-mCherry::CgHIS3 FAR8-3×GFP::natNT2 far10::kanMX6</i>                                                            |  |
| KOY8039 | BY4741 <i>TEF<sup>P</sup>-mito-DHFR-mCherry::CgHIS3 get1::natNT2 FAR8-3×GFP::hphNT1 far10::kanMX6</i>                                               |  |
| KOY8045 | BY4741 <i>TEF<sup>P</sup>-mito-DHFR-mCherry::CgHIS3 atg32::KIURA3 atg32(Δ151-200)-3HA</i>                                                           |  |
| KOY8046 | BY4741 <i>TEF<sup>P</sup>-mito-DHFR-mCherry::CgHIS3 get1::natNT2 atg32::KIURA3 ATG32-3HA</i>                                                        |  |
| KOY8047 | BY4741 <i>TEF<sup>P</sup>-mito-DHFR-mCherry::CgHIS3 get1::natNT2 atg32::KIURA3 atg32(Δ151-200)-3HA</i>                                              |  |
| KOY8049 | BY4741 <i>TEF<sup>P</sup>-mito-DHFR-mCherry::CgHIS3 get2::natNT2 atg32::KIURA3 ATG32-3HA</i>                                                        |  |
| KOY8050 | BY4741 <i>TEF<sup>P</sup>-mito-DHFR-mCherry::CgHIS3 get2::natNT2 atg32::KIURA3 atg32(Δ151-200)-3HA</i>                                              |  |
| KOY8051 | BY4741 <i>TEF<sup>P</sup>-mito-DHFR-mCherry::CgHIS3 FAR8-3×GFP::natNT2 far9::KIURA3</i>                                                             |  |
| KOY8054 | BY4741 <i>TEF<sup>P</sup>-mito-DHFR-mCherry::CgHIS3 get1::natNT2 FAR8-3×GFP::hphNT1 far9::KIURA3</i>                                                |  |
| KOY8066 | BY4741 <i>TEF<sup>P</sup>-mito-DHFR-mCherry::CgHIS3 far10::KIURA3</i>                                                                               |  |
| KOY8069 | BY4741 <i>TEF<sup>P</sup>-mito-DHFR-mCherry::CgHIS3 get1::natNT2 far10::natNT2</i>                                                                  |  |
| KOY8072 | BY4741 <i>TEF<sup>P</sup>-mito-DHFR-mCherry::CgHIS3 get2::natNT2 far10::natNT2</i>                                                                  |  |
| KOY8075 | BY4741 <i>TEF<sup>P</sup>-mito-DHFR-mCherry::CgHIS3 atg32::KIURA3 ATG11-HA-SmBiT::hphNT1 ATG32-3HA-3×mGFP-3FLAG-LgBiTn ppg1::KIURA3 PPG1</i>        |  |
| KOY8076 | BY4741 <i>TEF<sup>P</sup>-mito-DHFR-mCherry::CgHIS3 atg32::KIURA3 ATG11-HA-SmBiT::hphNT1 ATG32-3HA-3×mGFP-3FLAG-LgBiTn ppg1::KIURA3 PPG1(H111N)</i> |  |
| KOY8077 | BY4741 <i>TEF<sup>P</sup>-mito-DHFR-mCherry::CgHIS3 FAR8-3×GFP::kanMX6</i>                                                                          |  |
| KOY8079 | BY4741 <i>TEF<sup>P</sup>-mito-DHFR-mCherry::CgHIS3 get1::natNT2 FAR8-3×GFP::kanMX6</i>                                                             |  |
| KOY8081 | BY4741 <i>TEF<sup>P</sup>-mito-DHFR-mCherry::CgHIS3 get2::natNT2 FAR8-</i>                                                                          |  |

|         |                                                                                                                                                                  |  |
|---------|------------------------------------------------------------------------------------------------------------------------------------------------------------------|--|
|         | <i>3×GFP::kanMX6</i>                                                                                                                                             |  |
| KOY8092 | BY4741 <i>TEF<sup>P</sup>-mito-DHFR-mCherry::CgHIS3 atg32::KIURA3 ATG11-HA-SmBiT::hphNT1 ATG32-3HA-3×mGFP-3FLAG-LgBiTn ppg1::KIURA3 PPG1 get1::natNT2</i>        |  |
| KOY8095 | BY4741 <i>TEF<sup>P</sup>-mito-DHFR-mCherry::CgHIS3 atg32::KIURA3 ATG11-HA-SmBiT::hphNT1 ATG32-3HA-3×mGFP-3FLAG-LgBiTn ppg1::KIURA3 PPG1 get2::natNT2</i>        |  |
| KOY8098 | BY4741 <i>TEF<sup>P</sup>-mito-DHFR-mCherry::CgHIS3 atg32::KIURA3 ATG11-HA-SmBiT::hphNT1 ATG32-3HA-3×mGFP-3FLAG-LgBiTn ppg1::KIURA3 PPG1(H111N) get1::natNT2</i> |  |
| KOY8101 | BY4741 <i>TEF<sup>P</sup>-mito-DHFR-mCherry::CgHIS3 atg32::KIURA3 ATG11-HA-SmBiT::hphNT1 ATG32-3HA-3×mGFP-3FLAG-LgBiTn ppg1::KIURA3 PPG1(H111N) get2::natNT2</i> |  |
| KOY8107 | BY4741 <i>TEF<sup>P</sup>-mito-DHFR-mCherry::CgHIS3 atg32::KIURA3 ATG11-HA-SmBiT::hphNT1 ATG32-3HA-3×mGFP-3FLAG-LgBiTn far10::KIURA3</i>                         |  |
| KOY8110 | BY4741 <i>TEF<sup>P</sup>-mito-DHFR-mCherry::CgHIS3 atg32::KIURA3 ATG11-HA-SmBiT::hphNT1 ATG32-3HA-3×mGFP-3FLAG-LgBiTn get1::natNT2 far10::KIURA3</i>            |  |
| KOY8113 | BY4741 <i>TEF<sup>P</sup>-mito-DHFR-mCherry::CgHIS3 atg32::KIURA3 ATG11-HA-SmBiT::hphNT1 ATG32-3HA-3×mGFP-3FLAG-LgBiTn get2::natNT2 far10::KIURA3</i>            |  |
| KOY8115 | BY4741 <i>TEF<sup>P</sup>-mito-DHFR-mCherry::CgHIS3 atg32::KIURA3 ATG11-HA-SmBiT::hphNT1 ATG32-3HA-3×mGFP-3FLAG-LgBiTn far9::KIURA3 get2::natNT2</i>             |  |
| KOY8179 | BY4741 <i>TEF<sup>P</sup>-mito-DHFR-mCherry::CgHIS3 FAR8-3×GFP::hphNT1 FAR9-TM<sup>ER</sup>::kanMX6</i>                                                          |  |
| KOY8181 | BY4741 <i>TEF<sup>P</sup>-mito-DHFR-mCherry::CgHIS3 get1::natNT2 FAR8-3×GFP::hphNT1 FAR9-TM<sup>ER</sup>::kanMX6</i>                                             |  |
| KOY8183 | BY4741 <i>TEF<sup>P</sup>-mito-DHFR-mCherry::CgHIS3 get2::natNT2 FAR8-3×GFP::hphNT1 FAR9-TM<sup>ER</sup>::kanMX6</i>                                             |  |
| KOY8192 | BY4741 <i>TEF<sup>P</sup>-mito-DHFR-mCherry::CgHIS3 msp1::KIURA3 MSP1(E193Q)</i>                                                                                 |  |
| KOY8235 | BY4741 <i>TEF<sup>P</sup>-mito-DHFR-mCherry::CgHIS3 get3::natNT2 FAR8-3×GFP::kanMX6</i>                                                                          |  |
| KOY8347 | BY4741 <i>TEF<sup>P</sup>-mito-DHFR-mCherry::CgHIS3 atg32::KIURA3 ATG32-3HA msp1::natNT2</i>                                                                     |  |

|         |                                                                                                                                                                      |  |
|---------|----------------------------------------------------------------------------------------------------------------------------------------------------------------------|--|
| KOY8350 | BY4741 <i>TEF<sup>P</sup>-mito-DHFR-mCherry::CgHIS3 atg32::KIURA3 atg32(Δ151-200)-3HA msp1::natNT2</i>                                                               |  |
| KOY8353 | BY4741 <i>TEF<sup>P</sup>-mito-DHFR-mCherry::CgHIS3 atg32::KIURA3 ATG32-3HA get3::natNT2</i>                                                                         |  |
| KOY8356 | BY4741 <i>TEF<sup>P</sup>-mito-DHFR-mCherry::CgHIS3 atg32::KIURA3 atg32(Δ151-200)-3HA get3::natNT2</i>                                                               |  |
| KOY8386 | BY4741 <i>TEF<sup>P</sup>-mito-DHFR-mCherry::CgHIS3 msp1::natNT2 ppg1::zeoNT3</i>                                                                                    |  |
| KOY8389 | BY4741 <i>TEF<sup>P</sup>-mito-DHFR-mCherry::CgHIS3 get3::natNT2 ppg1::zeoNT3</i>                                                                                    |  |
| KOY8392 | BY4741 <i>TEF<sup>P</sup>-mito-DHFR-mCherry::CgHIS3 get3::natNT2 msp1::KIURA3 ppg1::zeoNT3</i>                                                                       |  |
| KOY8401 | BY4741 <i>TEF<sup>P</sup>-mito-DHFR-mCherry::CgHIS3 atg32::KIURA3 ATG32-3HA msp1::natNT2 get3::zeoNT3</i>                                                            |  |
| KOY8404 | BY4741 <i>TEF<sup>P</sup>-mito-DHFR-mCherry::CgHIS3 atg32::KIURA3 atg32(Δ151-200)-3HA msp1::natNT2 get3::zeoNT3</i>                                                  |  |
| KOY8440 | BY4741 <i>TEF<sup>P</sup>-mito-DHFR-mCherry::CgHIS3 atg32::KIURA3 ATG11-HA-SmBiT::hphNT1 ATG32-3HA-3×mGFP-3FLAG-LgBiTn FAR9-TM<sup>ER</sup>::kanMX6</i>              |  |
| KOY8442 | BY4741 <i>TEF<sup>P</sup>-mito-DHFR-mCherry::CgHIS3 atg32::KIURA3 ATG11-HA-SmBiT::hphNT1 ATG32-3HA-3×mGFP-3FLAG-LgBiTn get1::natNT2 FAR9-TM<sup>ER</sup>::kanMX6</i> |  |
| KOY8444 | BY4741 <i>TEF<sup>P</sup>-mito-DHFR-mCherry::CgHIS3 atg32::KIURA3 ATG11-HA-SmBiT::hphNT1 ATG32-3HA-3×mGFP-3FLAG-LgBiTn get2::natNT2 FAR9-TM<sup>ER</sup>::kanMX6</i> |  |
| KOY8446 | BY4741 <i>TEF<sup>P</sup>-mito-DHFR-mCherry::CgHIS3 msp1::natNT2 FAR8-3×GFP::kanMX6</i>                                                                              |  |
| KOY8554 | BY4741 <i>TEF<sup>P</sup>-mito-DHFR-mCherry::CgHIS3 FAR8-3×GFP::kanMX6 atg39::KIURA3 atg40::zeoNT3</i>                                                               |  |
| KOY8557 | BY4741 <i>TEF<sup>P</sup>-mito-DHFR-mCherry::CgHIS3 FAR8-3×GFP::hphNT1 atg32::natNT2 atg39::KIURA3 atg40::zeoNT3</i>                                                 |  |
| KOY8568 | BY4741 <i>TEF<sup>P</sup>-mito-DHFR-mCherry::CgHIS3 FAR8-3×GFP::natNT2 FAR9-TA<sup>MITO</sup>::hphNT1 FAR10-TA<sup>MITO</sup>::kanMX6</i>                            |  |
| KOY8570 | BY4741 <i>TEF<sup>P</sup>-mito-DHFR-mCherry::CgHIS3 ppg1::KIURA3 PPG1 FAR8-3×GFP::natNT2 FAR9-TA<sup>MITO</sup>::hphNT1 FAR10-TA<sup>MITO</sup>::kanMX6</i>          |  |
| KOY8572 | BY4741 <i>TEF<sup>P</sup>-mito-DHFR-mCherry::CgHIS3 ppg1::KIURA3 PPG1(H111N) FAR8-3×GFP::natNT2 FAR9-TA<sup>MITO</sup>::hphNT1 FAR10-TA<sup>MITO</sup>::kanMX6</i>   |  |

|         |                                                                                                                          |  |
|---------|--------------------------------------------------------------------------------------------------------------------------|--|
| KOY8719 | BY4741 <i>TEF<sup>P</sup>-mito-DHFR-mCherry::CgHIS3</i> <i>msp1::KIURA3</i><br><i>MSP1(E193Q)</i> <i>get3::natNT2</i>    |  |
| KOY8793 | BY4741 <i>SEC63-mCherry::KIURA3</i> <i>FAR8-3×GFP::hphNT1</i> <i>FAR9-TM<sup>ER</sup>::kanMX6</i>                        |  |
| KOY8795 | BY4741 <i>SEC63-mCherry::KIURA3</i> <i>get1::natNT2</i> <i>FAR8-3×GFP::hphNT1</i><br><i>FAR9-TM<sup>ER</sup>::kanMX6</i> |  |
| KOY9095 | BY4741 <i>SEC63-mCherry::KIURA3</i> <i>get2::natNT2</i> <i>FAR8-3×GFP::kanMX6</i><br><i>FAR9-TM<sup>ER</sup>::hphNT1</i> |  |

1. Brachmann, C.B., Davies, A., Cost, G.J., Caputo, E., Li, J., Hieter, P. and Boeke, J.D. (1998). Designer deletion strains derived from *Saccharomyces cerevisiae* S288C: a useful set of strains and plasmids for PCR-mediated gene disruption and other applications. *Yeast* **14**, 115-132.

**Table S2. Plasmid used in this study**

| Plasmid number | Name                      | Relevant characteristics                                     |
|----------------|---------------------------|--------------------------------------------------------------|
| KOB71          | pRS316- <i>ATG32-3HAn</i> | <i>CEN URA3 580 bp 5'-UTR &amp; 744 bp 3'-UTR from ATG32</i> |



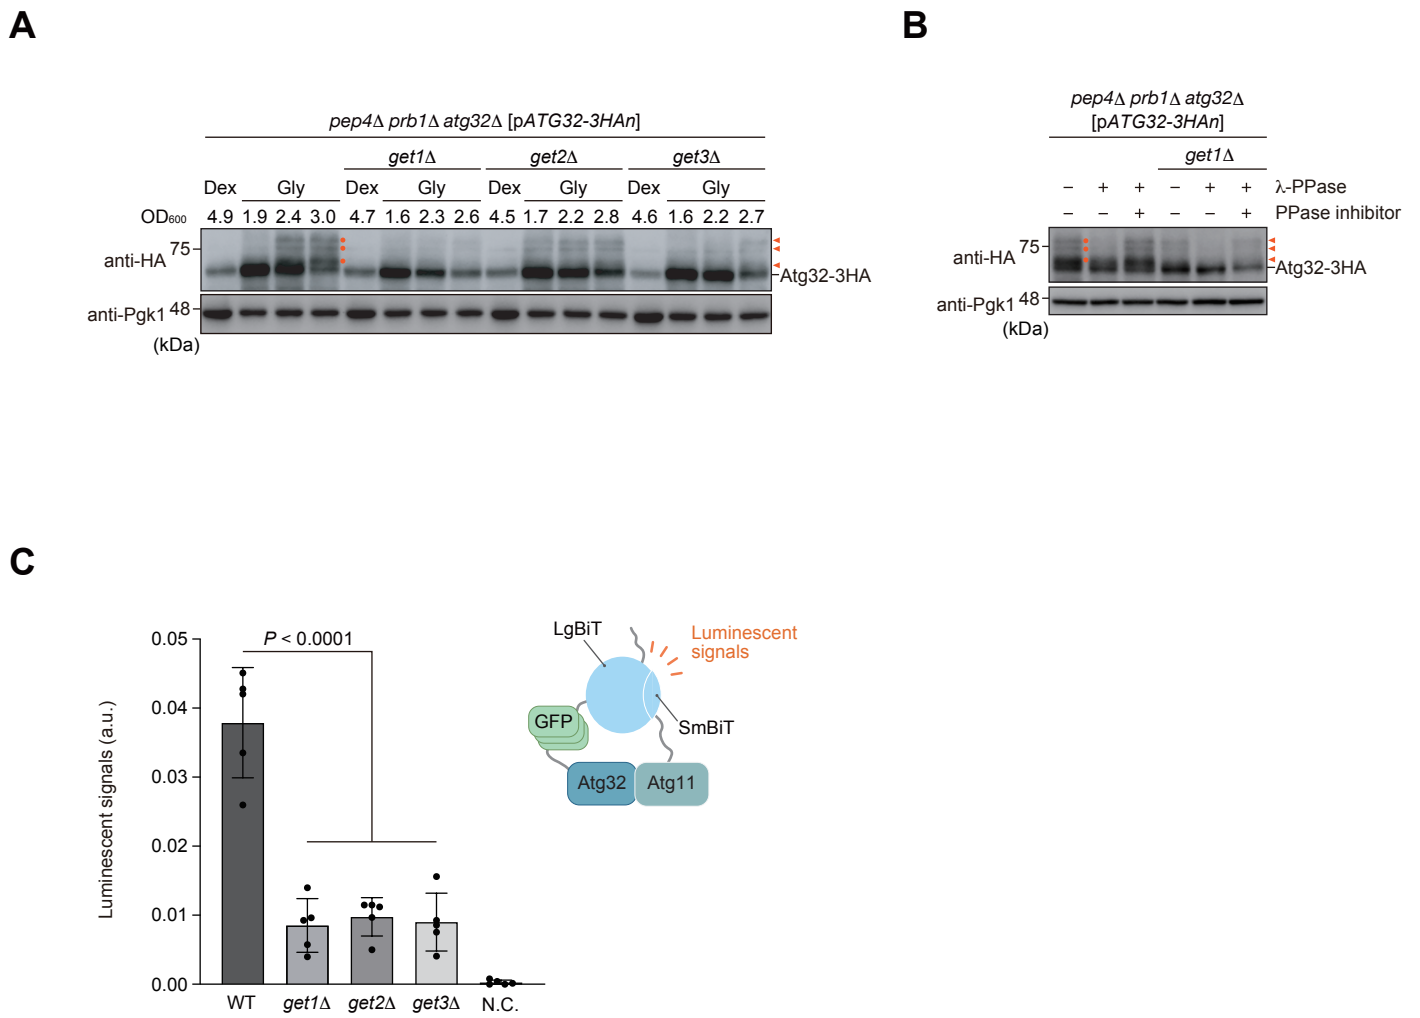

**A**

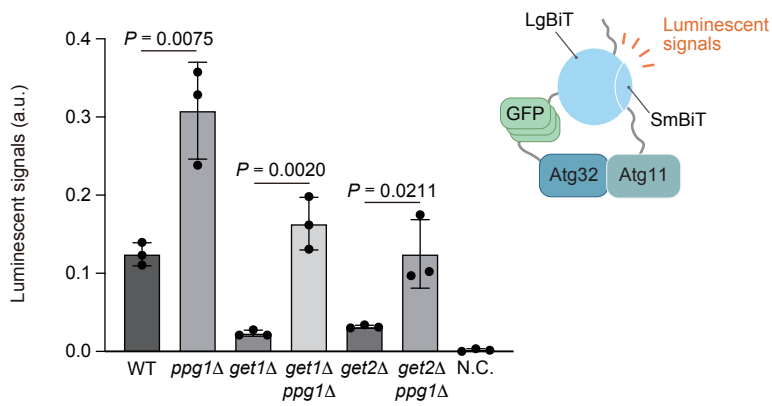

**B**

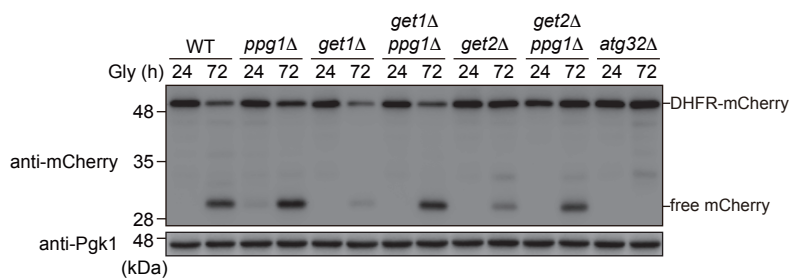

**C**

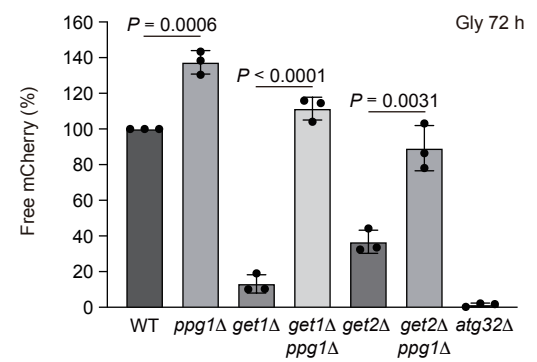

**D**

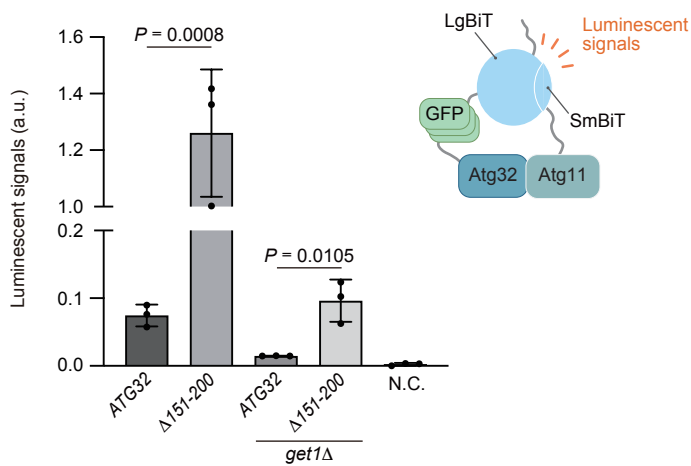

**E**

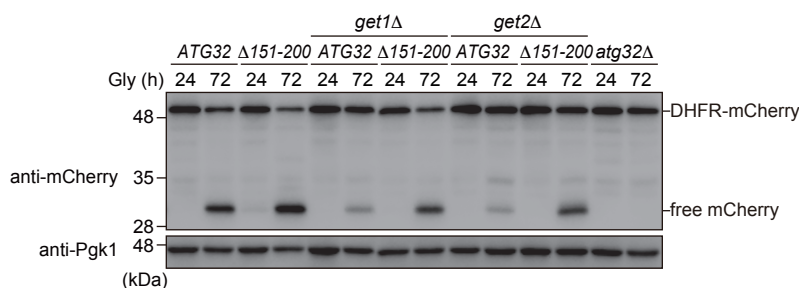

**F**

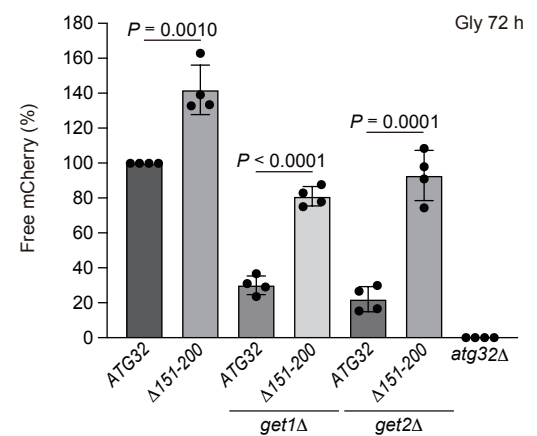

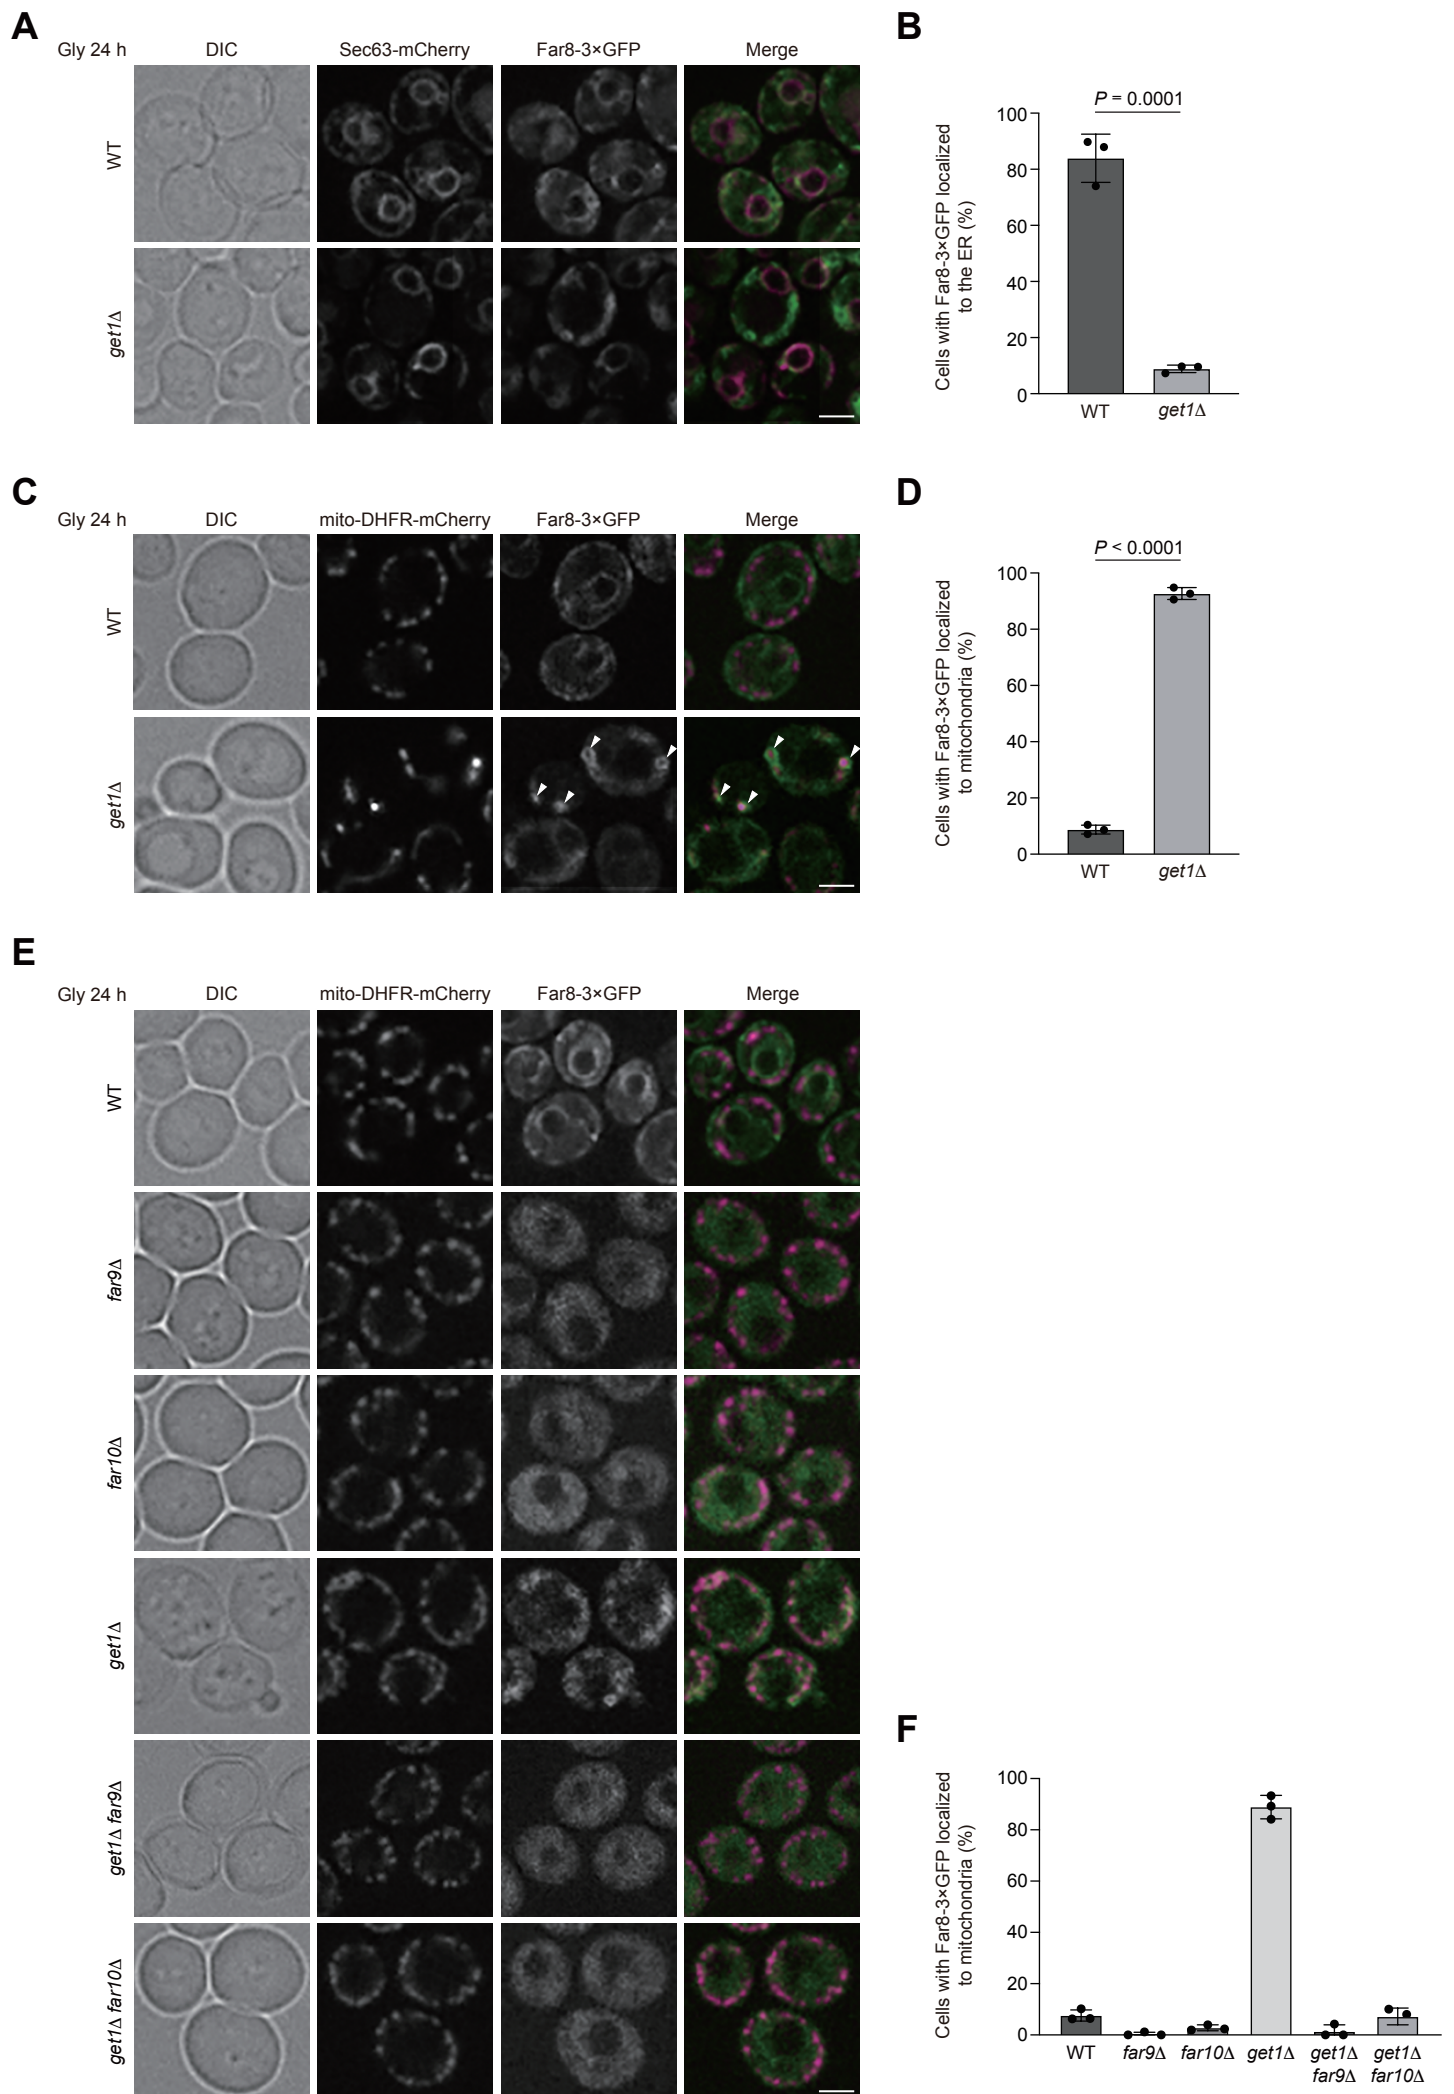

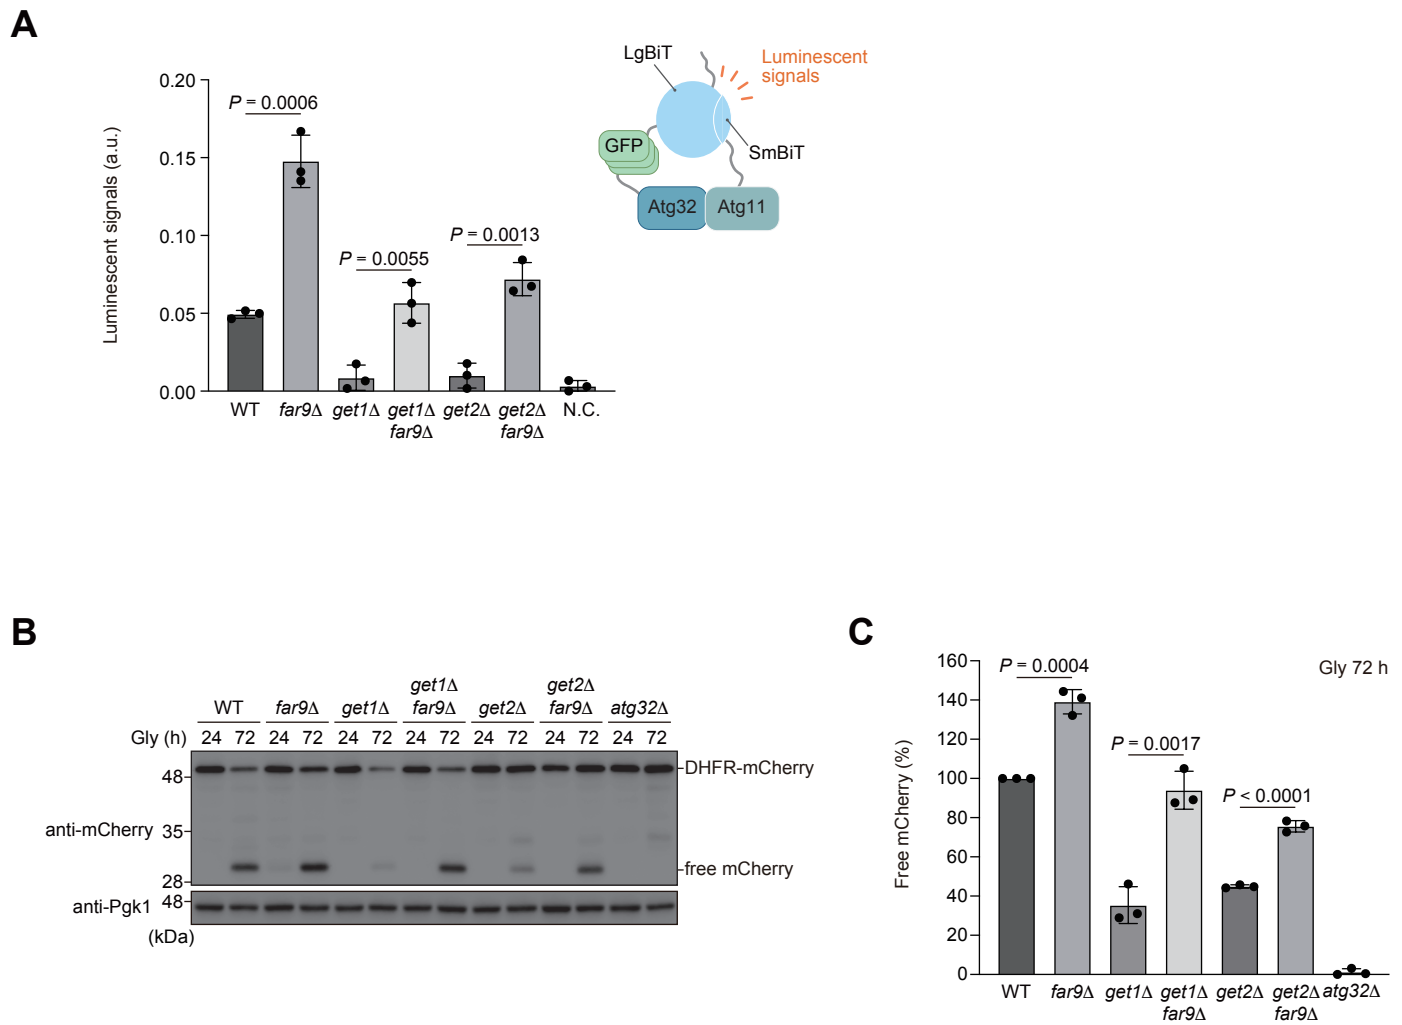

**A**

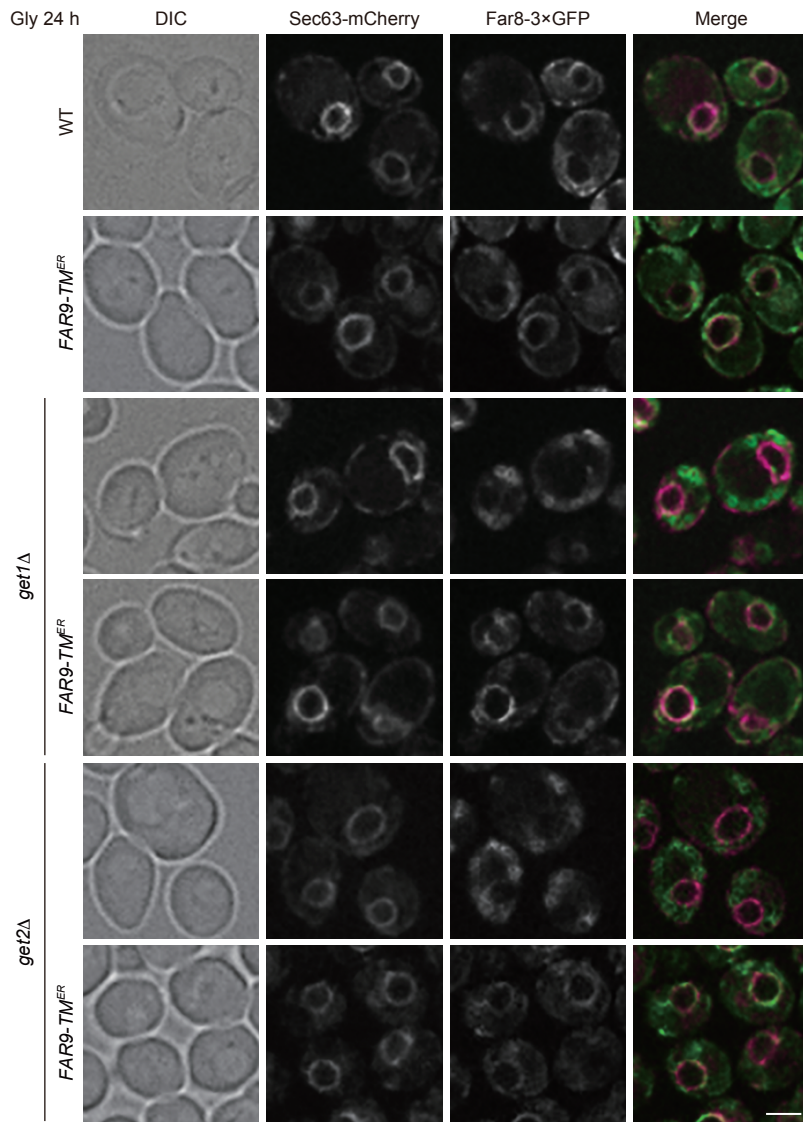

**B**

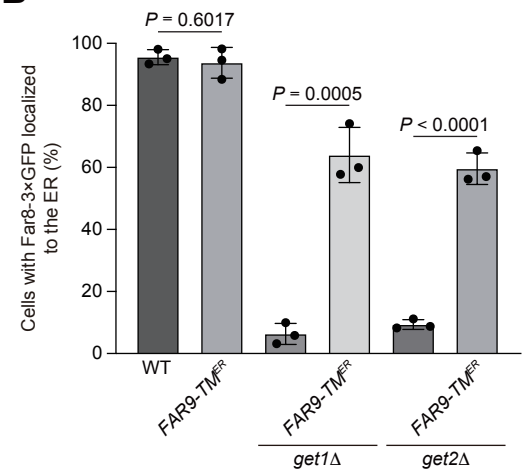

**C**

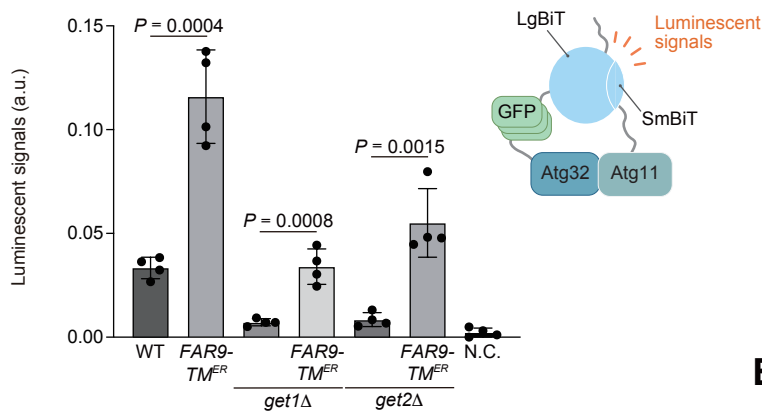

**D**

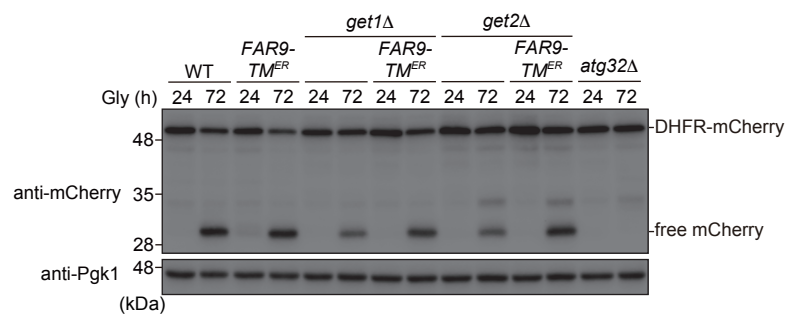

**E**

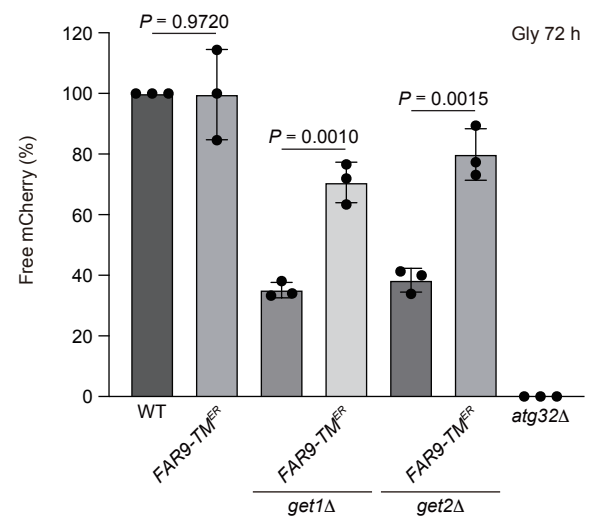

**A**

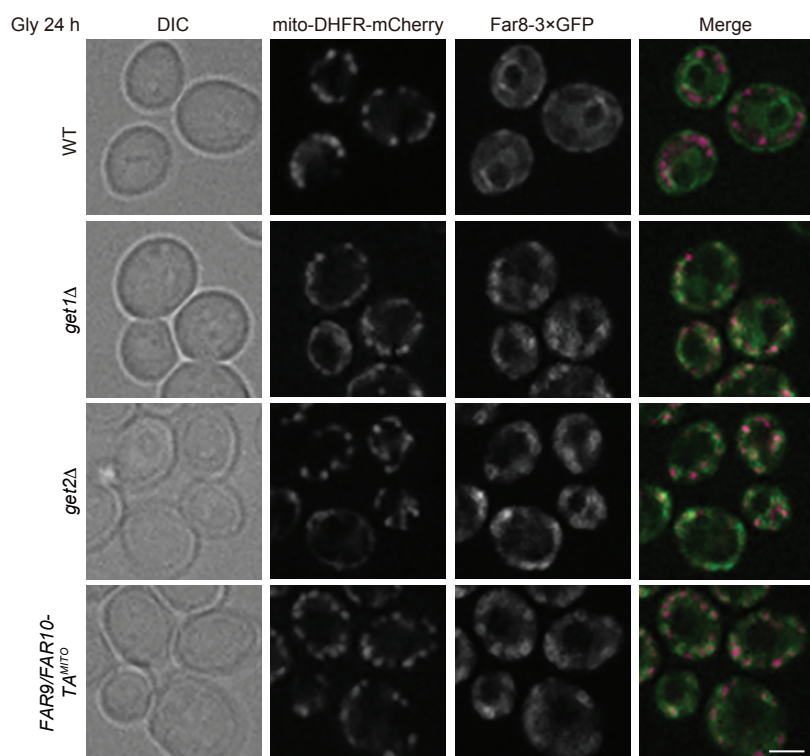

**B**

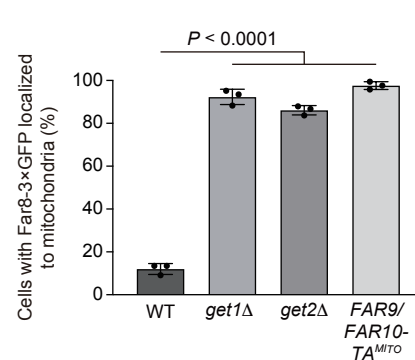

**C**

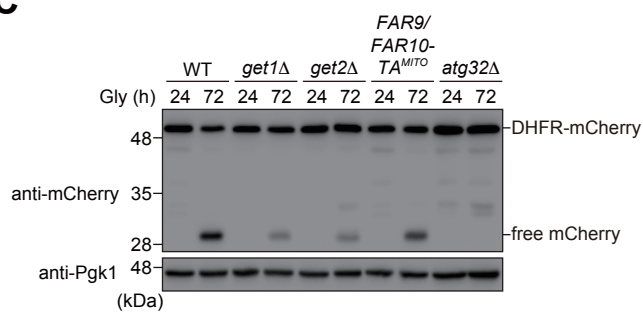

**D**

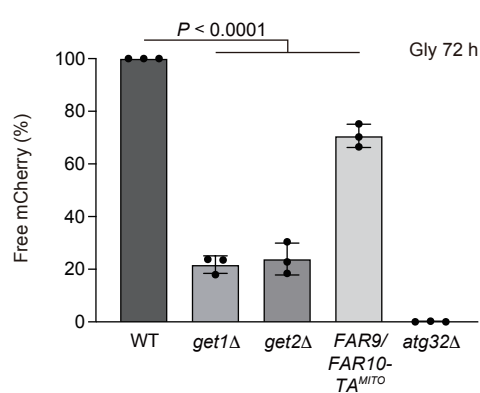

**A**

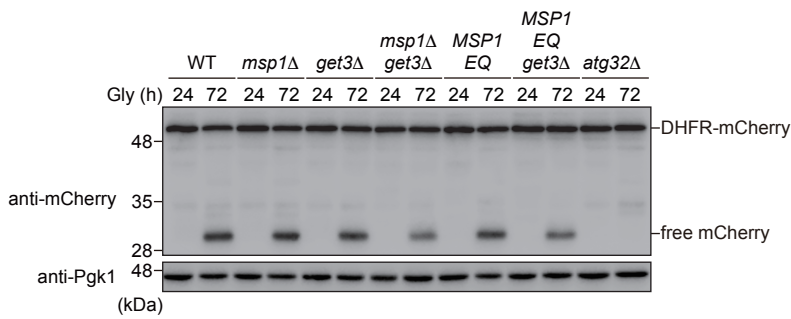

**B**

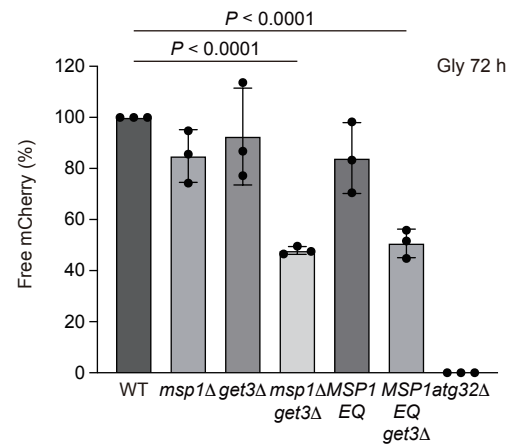

**C**

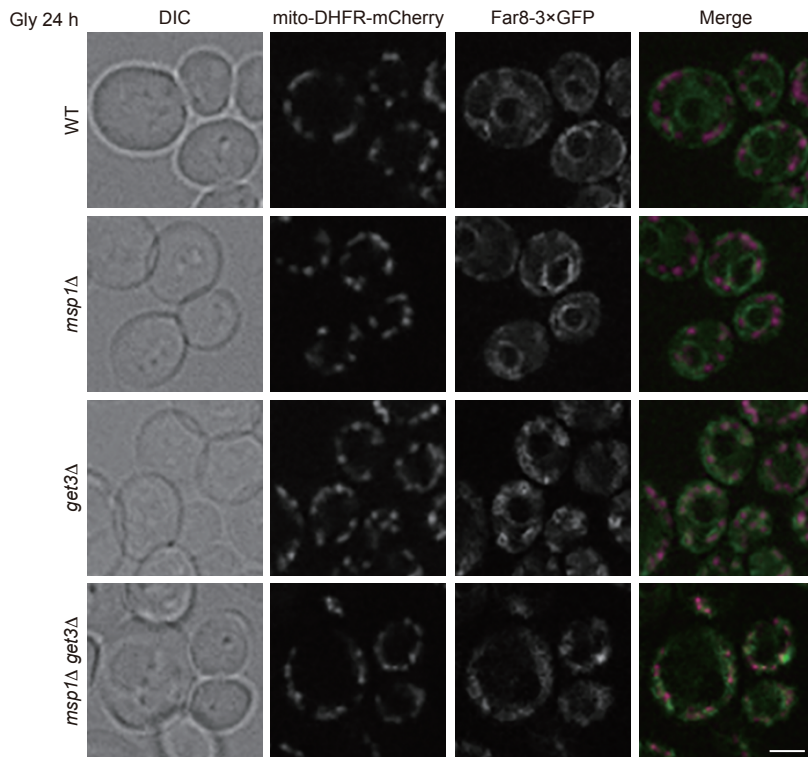

**D**

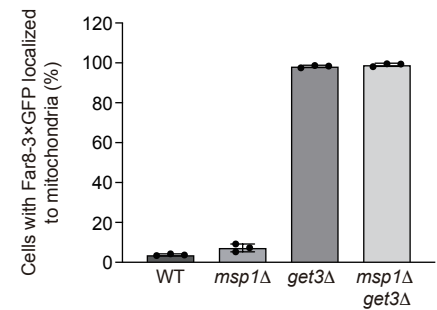

**E**

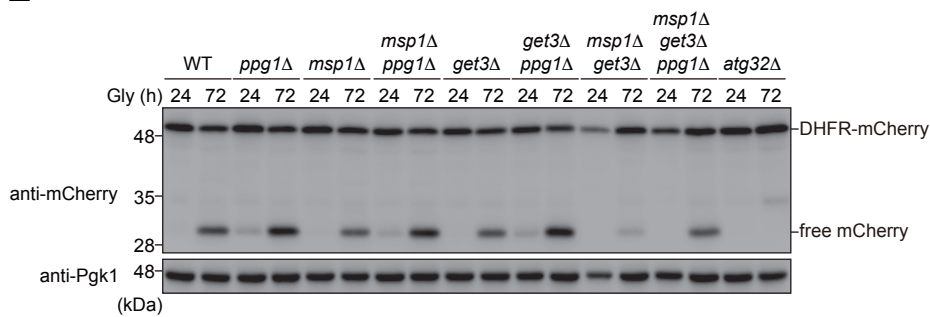

**F**

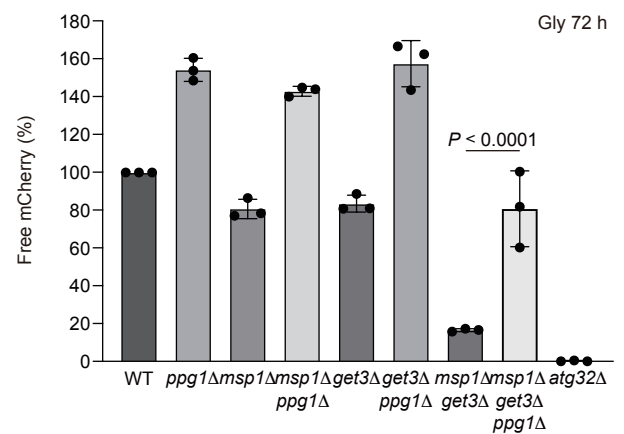

Mitophagy-noninducing conditions

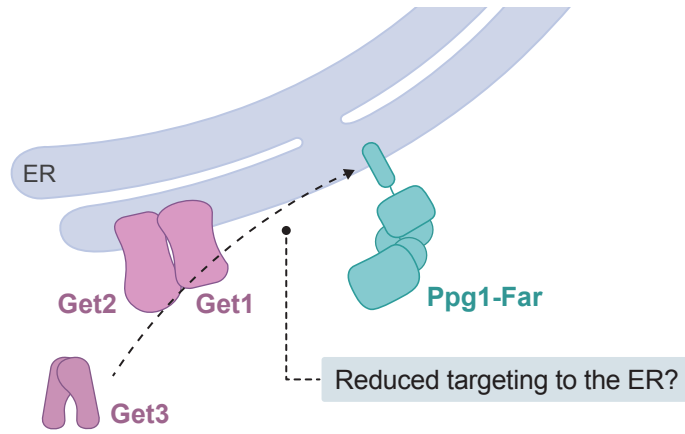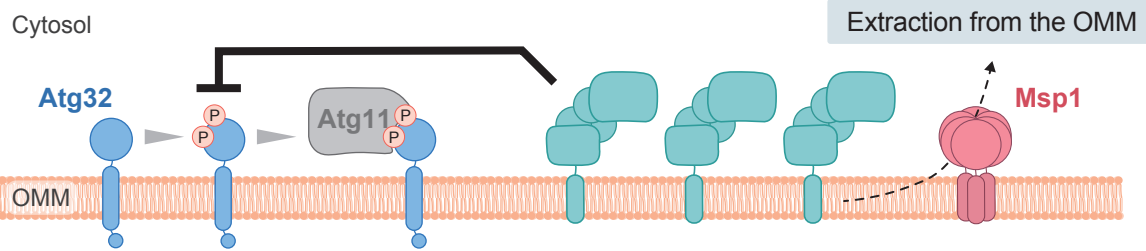

Mitophagy-inducing conditions

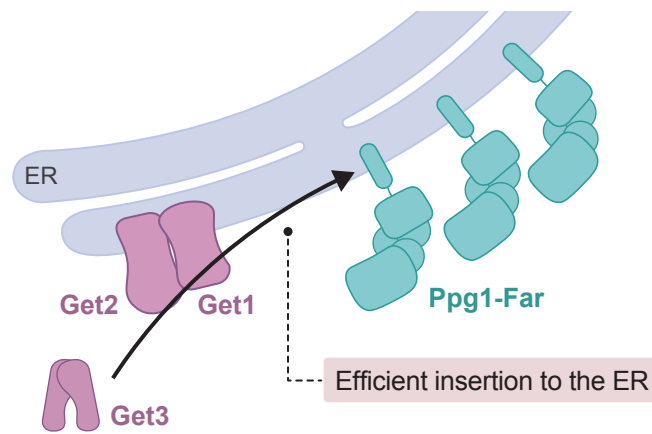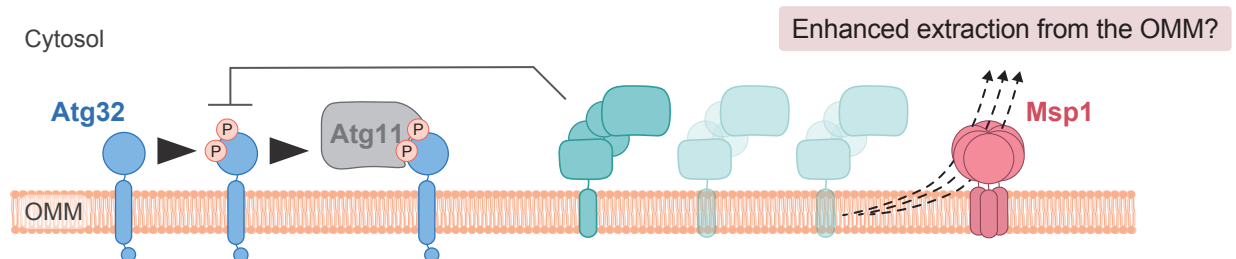



**A**

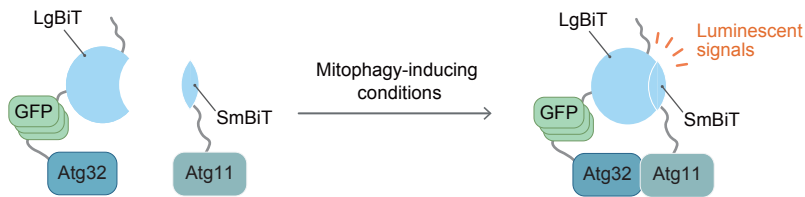

**B**

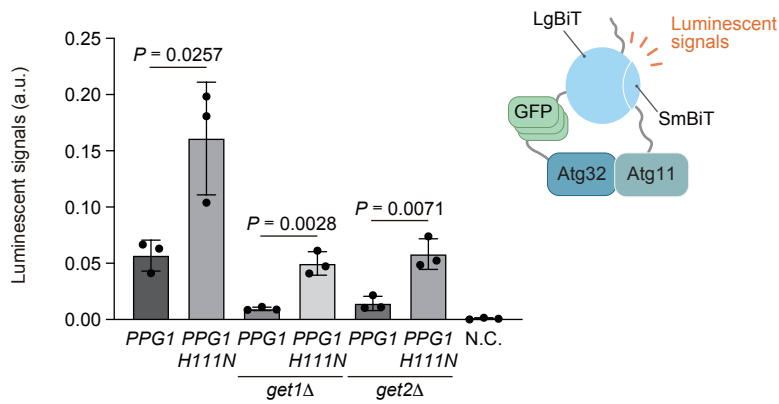

**C**

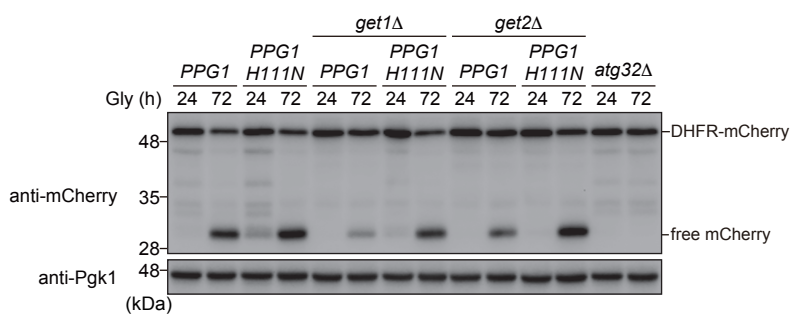

**D**

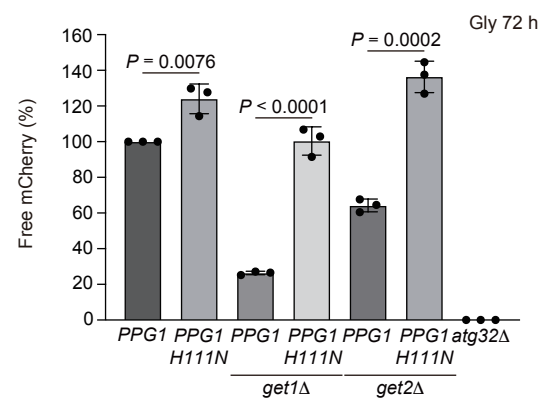

**A**

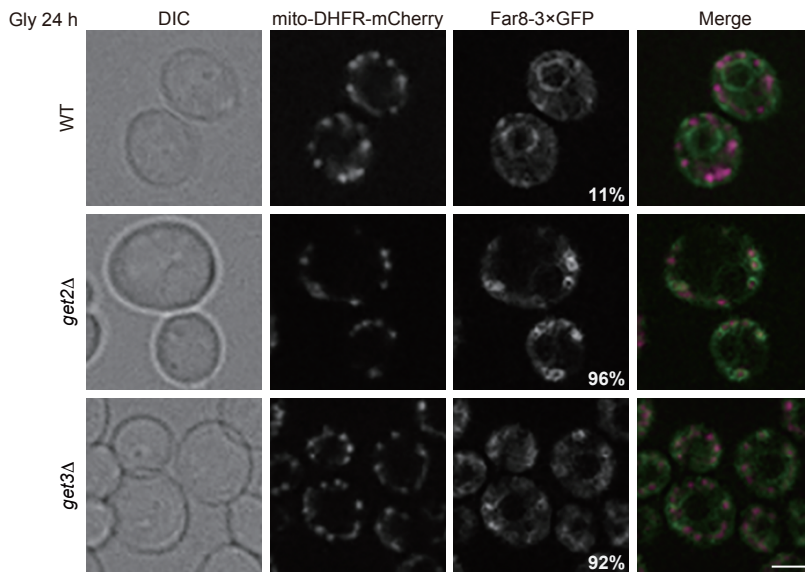

**B**

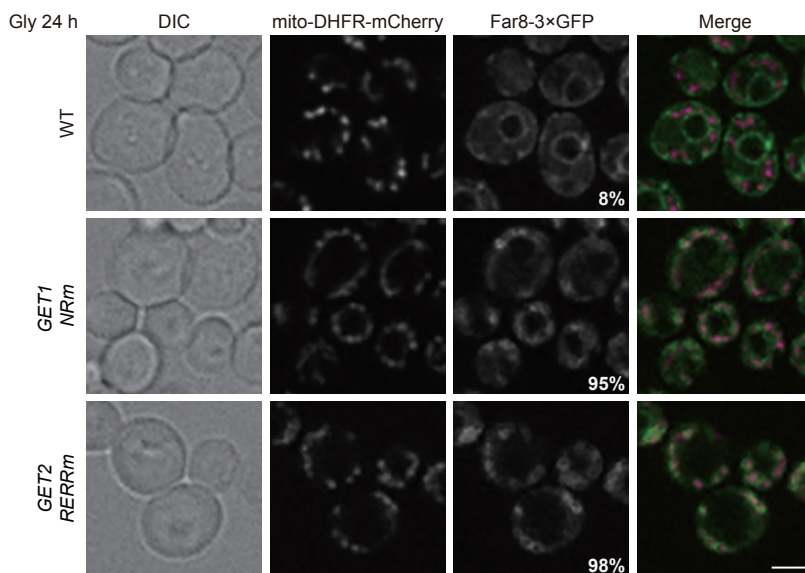

**C**

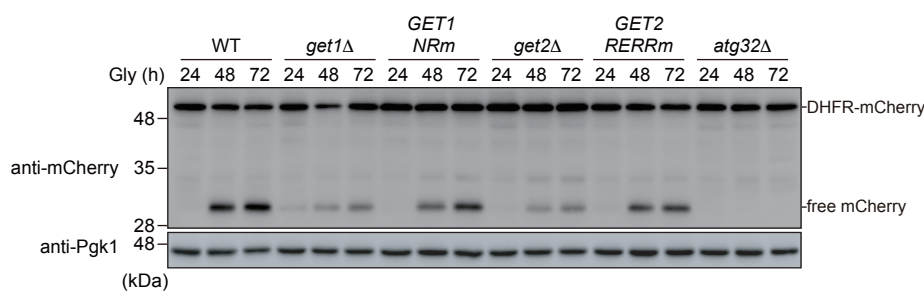

**D**

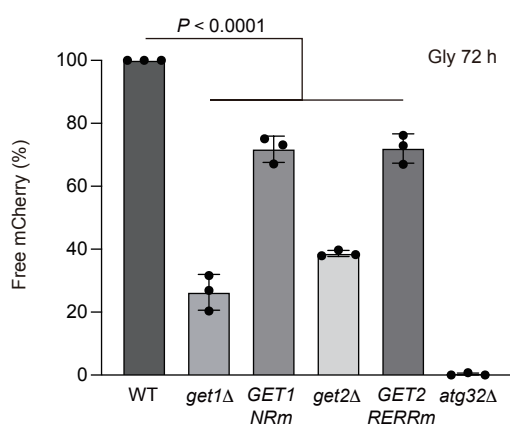

**E**

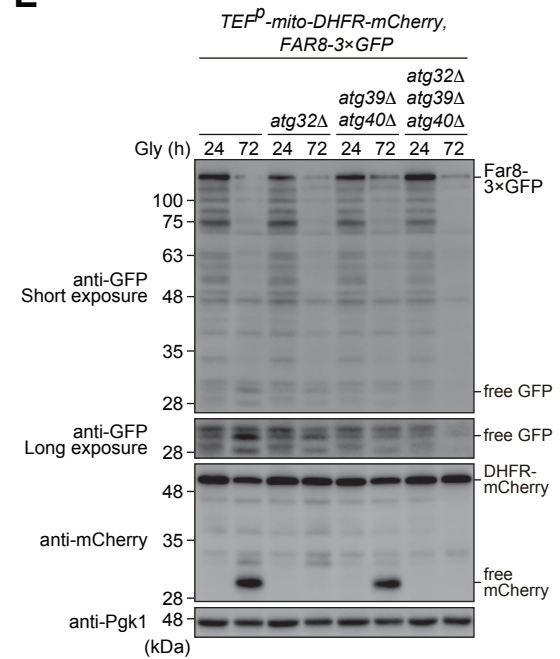

**F**

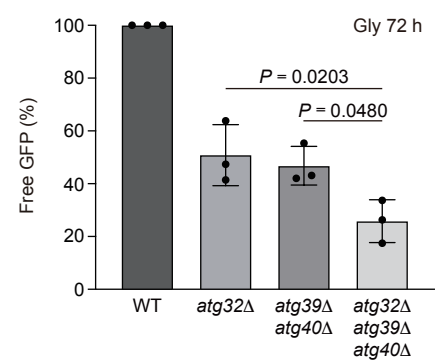

**A**

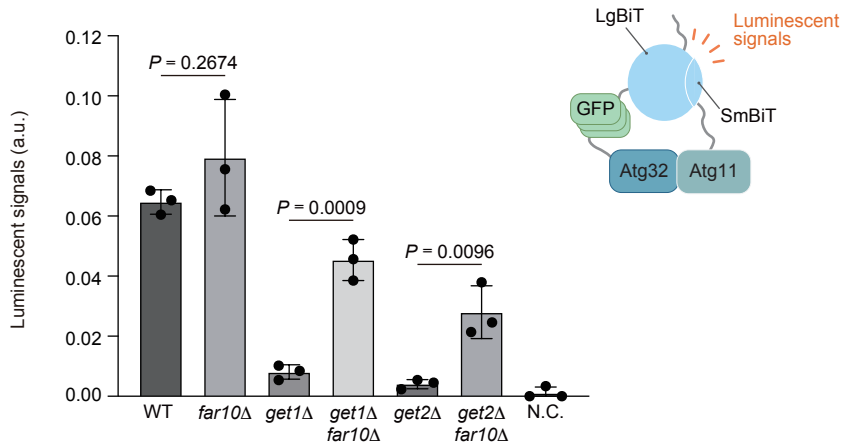

**B**

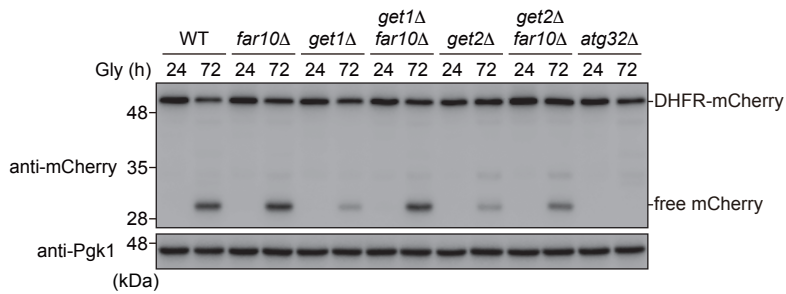

**C**

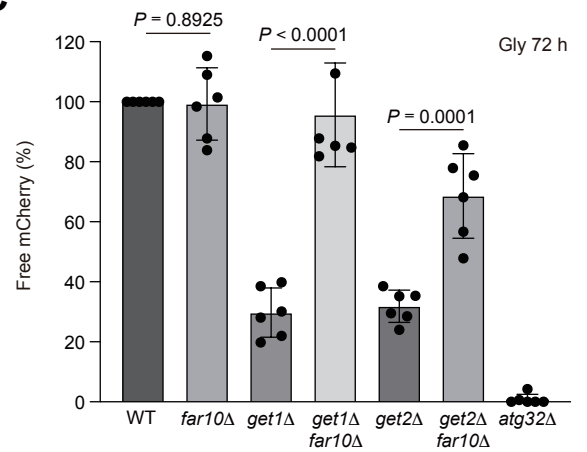

**A**

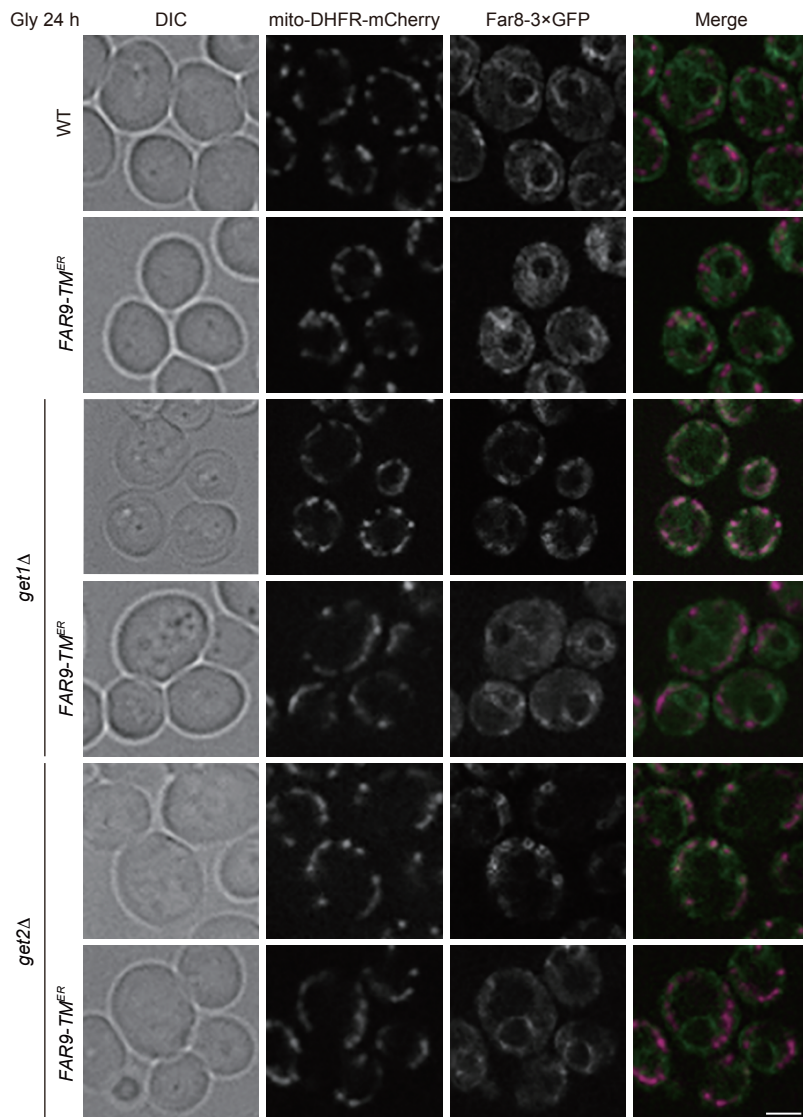

**B**

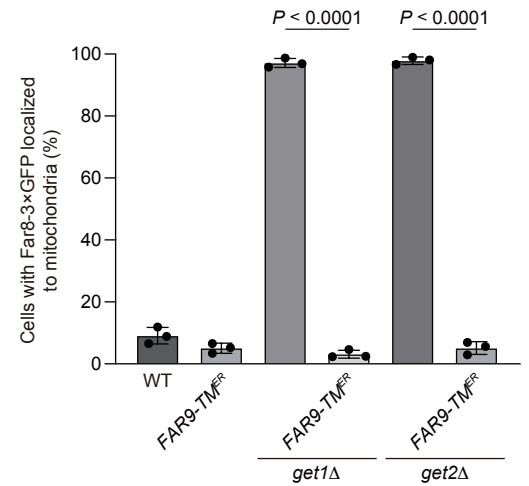

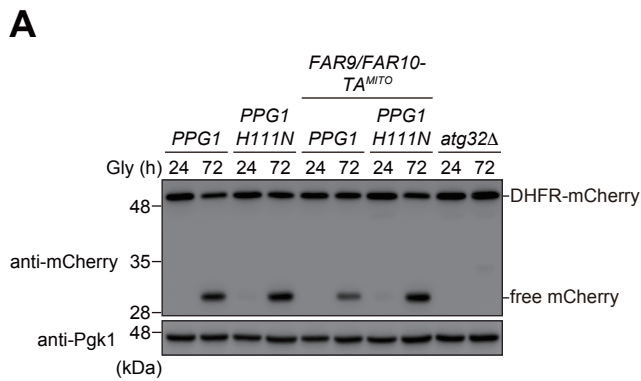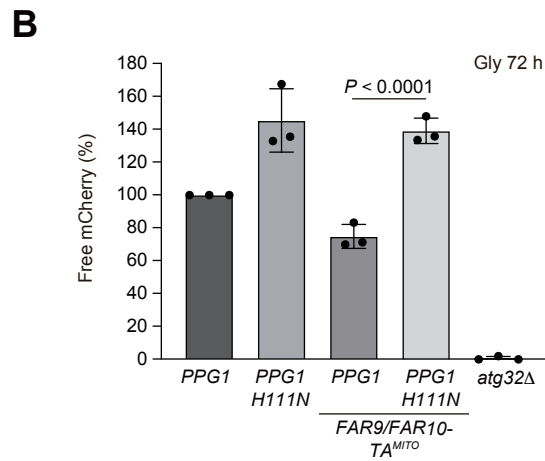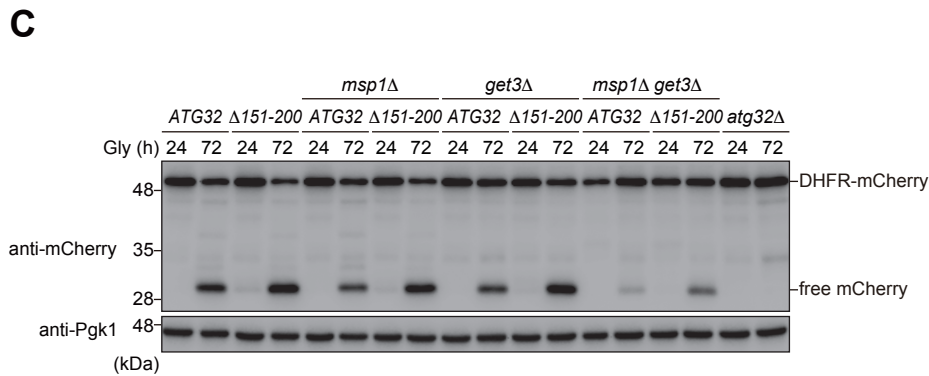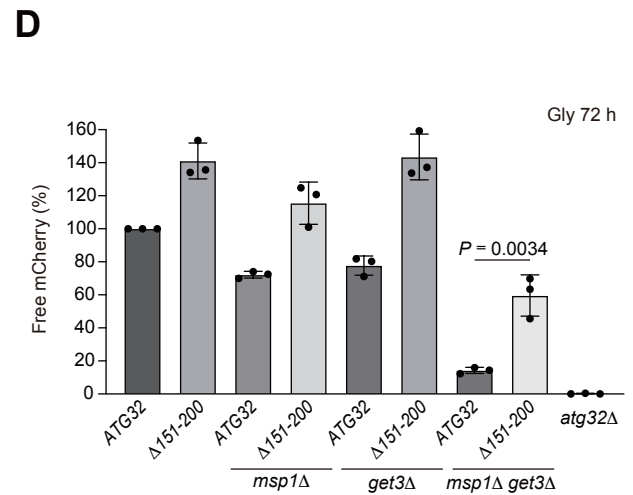

Source: https://www.biorxiv.org/content/biorxiv/early/2021/09/21/2021.09.20.461067.full.pdf
